# Supplementary material for: Early intervention with Kan Jang® to treat upper-respiratory tract infections: A randomized, quadruple-blind study
Source: PubMed Central journal article supplement (PMC8572720; doi:10.1016/j.jtcme.2021.06.001), 2021-06-11

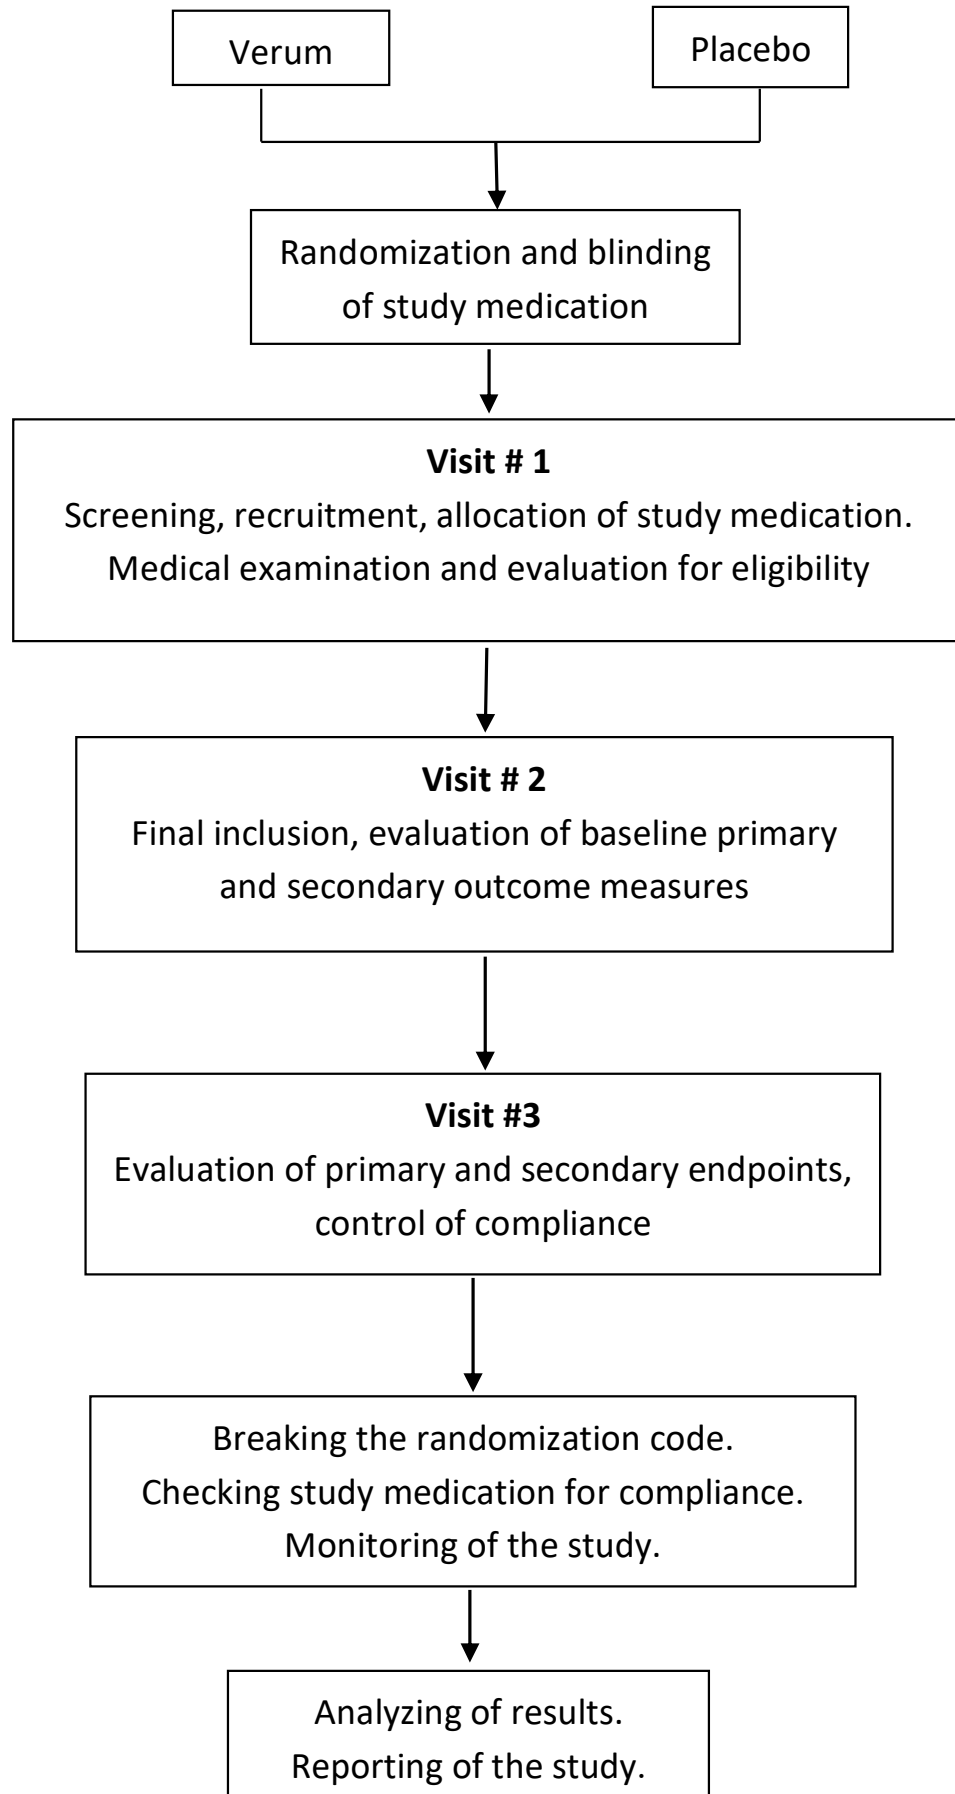

Supplement: mmc1.pdf [file mmc1.pdf]
