# Supplementary material for: Early intervention with Kan Jang® to treat upper-respiratory tract infections: A randomized, quadruple-blind study
Source: PubMed Central journal article supplement (PMC8572720; doi:10.1016/j.jtcme.2021.06.001), 2021-06-11
Supplement: mmc2.pdf [file mmc2.pdf]

## SUPPLEMENT 1

### *Name of the medicinal product*

KanJang Andrographis® with fixed combination of Andrographis paniculata herb extract and Eleutherococcus senticosus root extract.

### Pharmaceutical form

Capsules

### *Indication for use*

Herbal Medicinal Product for the “*reduction in the severity and duration of symptoms of uncomplicated respiratory tract infections (common cold)*”.

### *Dosage*

The recommended daily dose is 2 capsules 3 times per day for adults.

### *Quantitative Composition*

| <b>Substance</b>                                                                                                                                                                                                                                                                                                                                      | <b>Quantity per one capsule, mg</b> |
|-------------------------------------------------------------------------------------------------------------------------------------------------------------------------------------------------------------------------------------------------------------------------------------------------------------------------------------------------------|-------------------------------------|
| <b><i>Active ingredients</i></b>                                                                                                                                                                                                                                                                                                                      |                                     |
| Herba Andrographidis standardised extract containing 66-110 mg of native dry extract<br>( DER 4,5-8,0 :1, extraction agent - ethanol* 70 %, V/V) corresponding to <b>10 mg</b> of the sum of andrographolides (andrographolide and deoxydidehydro-andrographolide) and 45-67% of maltodextrin**(adjuvant for adjustment)                              | 250                                 |
| <i>Radix Eleutherococci</i> root extract, containing 11.4 mg of native dry extract (DER 17-30:1, extraction agent – ethanol 70%, V/V) , corresponding to 194-342 mg of herbal substance ( <i>Radix Eleutherococci</i> , standardized for the content of eleutherosides B and E (0.4 mg/capsule) and 50% of maltodextrine** (adjuvant for adjustment ) | 22,8                                |
| <b><i>Inactive ingredients</i></b>                                                                                                                                                                                                                                                                                                                    |                                     |
| Microcrystalline cellulose                                                                                                                                                                                                                                                                                                                            | 70                                  |
| Magnesium stearate                                                                                                                                                                                                                                                                                                                                    | 7.2                                 |
| <b>Vegetable capsule</b>                                                                                                                                                                                                                                                                                                                              | 75                                  |
| <b>Total weight</b>                                                                                                                                                                                                                                                                                                                                   | 425 ± 21                            |

Product: **Kan Jang Andrographis**  
 Product category: Herbal medicinal product  
 Dosage form: capsules  
**Daily dose: 6 capsules size 1**  
 Batch number: 50145  
 Batch size: 5000 capsules

### Composition

| Ingredients                                                                          | Ratio  | Ratio <sup>native</sup><br>extract | 1 capsule contains          |                                   |                       |
|--------------------------------------------------------------------------------------|--------|------------------------------------|-----------------------------|-----------------------------------|-----------------------|
|                                                                                      |        |                                    | herbal<br>substance<br>, mg | native extract,<br>mg             | dry<br>extract,<br>mg |
| <i>Andrographis paniculata</i><br>herb, dry extract<br>batch nr: 1521114             | 3.9:1  | 6.7:1                              | 1003.47                     | 195.7<br>10mg<br>andrographolides | 249,0                 |
| <i>Eleutherococcus</i><br><i>senticosus</i> , radix dry<br>extract, batch nr:1521077 | 9,00:1 | 18.00:1                            | 205.00                      | 11,4                              | 22,8                  |
| Microcrystalline cellulose,<br>batch nr. 1960752                                     |        |                                    |                             |                                   | 85,0                  |
| Magnesium stearate, batch<br>nr. 1960738                                             |        |                                    |                             |                                   | 7,2                   |
| Total                                                                                |        |                                    |                             |                                   | 364,00                |
| Capsules of plant origin size 1, colour: clear, weight – 76 mg                       |        |                                    |                             |                                   |                       |
| Hypromellose – 100%, water content – 6%                                              |        |                                    |                             |                                   |                       |
| Filled capsules weight                                                               |        |                                    | 440,00mg±33mg               |                                   |                       |

Product: **Placebo**  
 Product category: Herbal medicinal product  
 Dosage form: capsules  
**Daily dose: 6 capsules size 1**  
 Batch number: 50137-1  
 Batch size: 4000 capsules

### Composition

| <b>Ingredients</b>                                             | 1 capsule contains,<br>mg |
|----------------------------------------------------------------|---------------------------|
| Lactose monohydrate, batch nr. U2EX 417                        | 205                       |
| Decaffeinated coffe, batch nr. U2EX 424                        | 151                       |
| Magnesium stearate                                             | 8                         |
| Total                                                          | 364                       |
| Capsules of plant origin size 1, colour: clear, weight – 76 mg |                           |
| Hypromellose – 100%, water content – 6%                        |                           |
| Filled capsules weight                                         | 440 mg±33 mg              |

# Certificate of analysis

Capsule: Ken Jong Andrographis Batch no: 50.145

Doc.no:  
ANJC.

Extr. Andr. succ 1521114

Bulk batch no:         

Internal spec. no:

Extr. Eleuth succ 1521077

SP.FV-

Extr.         

| Parameter of analysis    | Method                  | Reference          | Result               |
|--------------------------|-------------------------|--------------------|----------------------|
| Appearance               | Occular                 | SP.FV-             |                      |
| Smell                    | O.L                     | SP.FV-             |                      |
| Total ash                | Ph.Eur.Curr.Ed          |                    | 6%                   |
| Ash, insoluble in HCl    | Ph.Eur.Curr.Ed          |                    | 1%                   |
| Loss on drying           | Ph.Eur.Curr.Ed          |                    | 3%                   |
| Identity (TLC)           | <u>SM-010</u>           | <u>ref</u>         | <u>ref</u>           |
| HPLC                     |                         |                    |                      |
| Eleuth B                 | <u>SM-066</u>           |                    | <u>0,084 mg/del</u>  |
| Eleuth E                 | <u>SM-066</u>           |                    | <u>0,119 mg/del</u>  |
| Σ Eleutherosides         |                         |                    | <u>0,203 mg/del</u>  |
| Andrographolide          |                         |                    | <u>8,15 mg/del</u>   |
| DDD-andr.                |                         |                    | <u>1,50 mg/del</u>   |
| Σ Andr + DDD-andr        |                         |                    | <u>9,65 mg/del</u>   |
| Neoandr.                 |                         |                    | <u>3,44 mg/del</u>   |
| Weight including capsule | Ph.Eur.Curr.Ed          | <u>440 ± 33 mg</u> | <u>418 ± 3 mg</u>    |
| Weight without capsule   | -                       | <u>364 ± 27 mg</u> | <u>342 ± 3 mg</u>    |
| Diameter                 | -                       |                    | <u>6,9 ± 0,1 mm</u>  |
| Length                   | -                       |                    | <u>19,3 ± 0,1 mm</u> |
| Disintegration           | Ph.Eur.Curr.Ed (SM-032) | ≤ 30 min           | <u>&lt; 30 min</u>   |
|                          |                         | <b>Reference</b>   | <b>Released</b>      |
| Microbial contamination  | Ph.Eur.Curr.Ed          | Ph.Eur.Cat B       |                      |

Date of analysis: 111028

Date of release: 2011/1/5

Analyst, sign: no/JY

QP-responsible:         

**Comments:**

Manufacturing date:

Expiry date (two years):

# Kan Jang Andrographis capsules

## HPTLC

### 50 145

Method: SM-010

VIS

Ref 3400036  
Test 50145

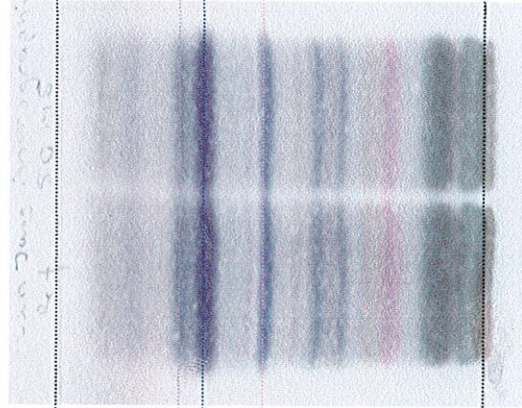

DDD-and  
Rf: 0,71  
Andr  
Rf: 0,66  
Neo-and  
Rf: 0,51

254nm

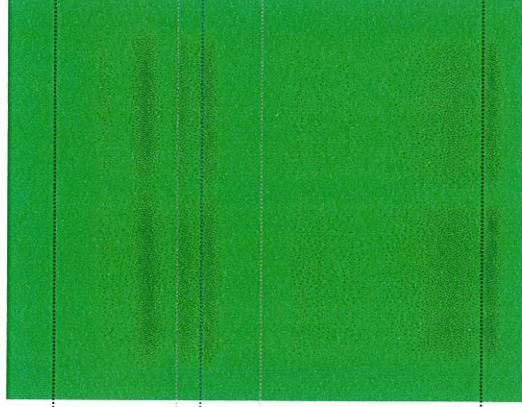

366nm

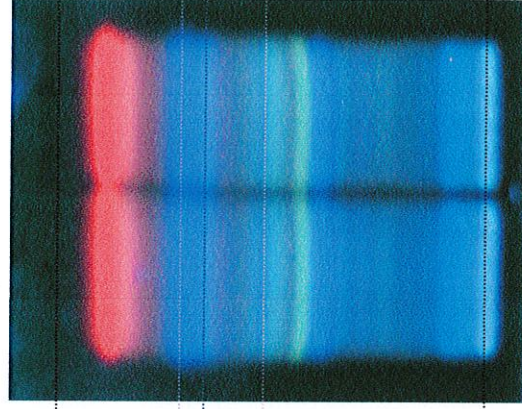

Front

Start

Absorbent: Silica gel 60 F<sub>254</sub> precoated HPTLC plates  
Solvent system: Ethylacetate : methanol : water (38 : 7 : 4)  
Spray reagents: vanillin-sulphuric acid solution

Sign: *Mattias*

Date: 2011-11-02

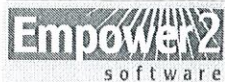

**SampleName KJ kaps 50145**

Current Date 2011-10-28  
 Software Empower 2 Software Build 2154  
 Column no.: Acquity UPLC BEH C18 1.7µm  
 01773000715504  
 Channel 205 nm, 223 nm, 254 nm  
 Run Time 5.00 Minutes

Processing Method Andrographis  
 Start Date 2011-10-28 10:09:49 CEST

**Name Andrographolide,  
 Deoxy-didehydroandrographolide,  
 Neoandrographolide**

Tbl. weight: 342 (418) mg

**Component Results  
 Name: Andrographolide**

|           | SampleName    | SampleWeight | RT    | Area   | Height | Name            | Percent_amount |
|-----------|---------------|--------------|-------|--------|--------|-----------------|----------------|
| 1         | KJ kaps 50145 | 3.12880      | 1.974 | 502517 | 316756 | Andrographolide | 2.384          |
| 2         | KJ kaps 50145 | 3.12880      | 1.975 | 502858 | 317162 | Andrographolide | 2.385          |
| 3         | KJ kaps 50145 | 3.12880      | 1.975 | 502143 | 317438 | Andrographolide | 2.382          |
| Mean      |               |              |       |        |        |                 | 2.383          |
| Std. Dev. |               |              |       |        |        |                 | 0.002          |
| % RSD     |               |              |       |        |        |                 | 0.07           |

**Component Results  
 Name: Neoandrographolide**

|           | SampleName    | SampleWeight | RT    | Area   | Height | Name               | Percent_amount |
|-----------|---------------|--------------|-------|--------|--------|--------------------|----------------|
| 1         | KJ kaps 50145 | 3.12880      | 2.931 | 179403 | 167106 | Neoandrographolide | 1.009          |
| 2         | KJ kaps 50145 | 3.12880      | 2.932 | 179028 | 166937 | Neoandrographolide | 1.007          |
| 3         | KJ kaps 50145 | 3.12880      | 2.933 | 178994 | 166954 | Neoandrographolide | 1.007          |
| Mean      |               |              |       |        |        |                    | 1.007          |
| Std. Dev. |               |              |       |        |        |                    | 0.001          |
| % RSD     |               |              |       |        |        |                    | 0.13           |

**Component Results  
 Name: Deoxy-didehydroandrographolide**

|           | SampleName    | SampleWeight | RT    | Area  | Height | Name                           | Percent_amount |
|-----------|---------------|--------------|-------|-------|--------|--------------------------------|----------------|
| 1         | KJ kaps 50145 | 3.12880      | 3.201 | 73898 | 54169  | Deoxy-didehydroandrographolide | 0.439          |
| 2         | KJ kaps 50145 | 3.12880      | 3.202 | 73800 | 54106  | Deoxy-didehydroandrographolide | 0.438          |
| 3         | KJ kaps 50145 | 3.12880      | 3.202 | 74005 | 54232  | Deoxy-didehydroandrographolide | 0.439          |
| Mean      |               |              |       |       |        |                                | 0.439          |
| Std. Dev. |               |              |       |       |        |                                | 0.001          |
| % RSD     |               |              |       |       |        |                                | 0.14           |

| Results                                      | mg/tbl       | calculated   | %found |
|----------------------------------------------|--------------|--------------|--------|
| <b>Andrographolide:</b>                      | 8,15 mg/tbl  | 8,38 mg/tbl  |        |
| <b>Neoandrographolide:</b>                   | 3,44 mg/tbl  | 3,70 mg/tbl  |        |
| <b>Deoxy-11,12-didehydroandrographolide:</b> | 1,50 mg/tbl  | 1,59 mg/tbl  |        |
| <b>Total :</b>                               | 13,09 mg/tbl | 13,67 mg/tbl | 96%    |

Sign: 

**Chromatogram**

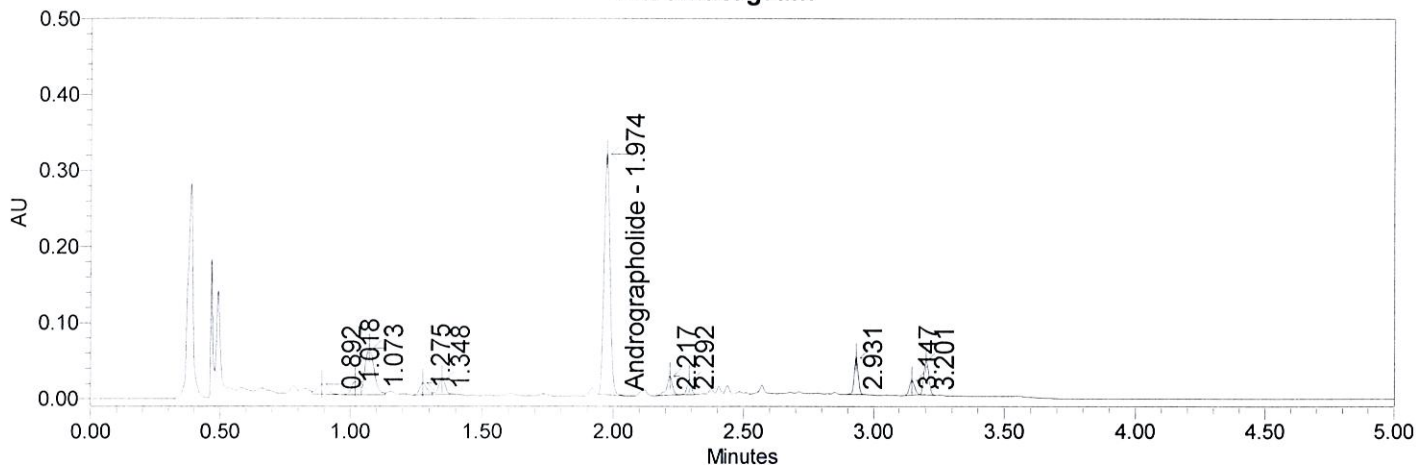

SampleName KJ kaps 50145; Vial 1:A,1; Injection 1; Date Acquired 2011-10-28 10:10:40 CEST; Channel Name 223 nm

**Chromatogram**

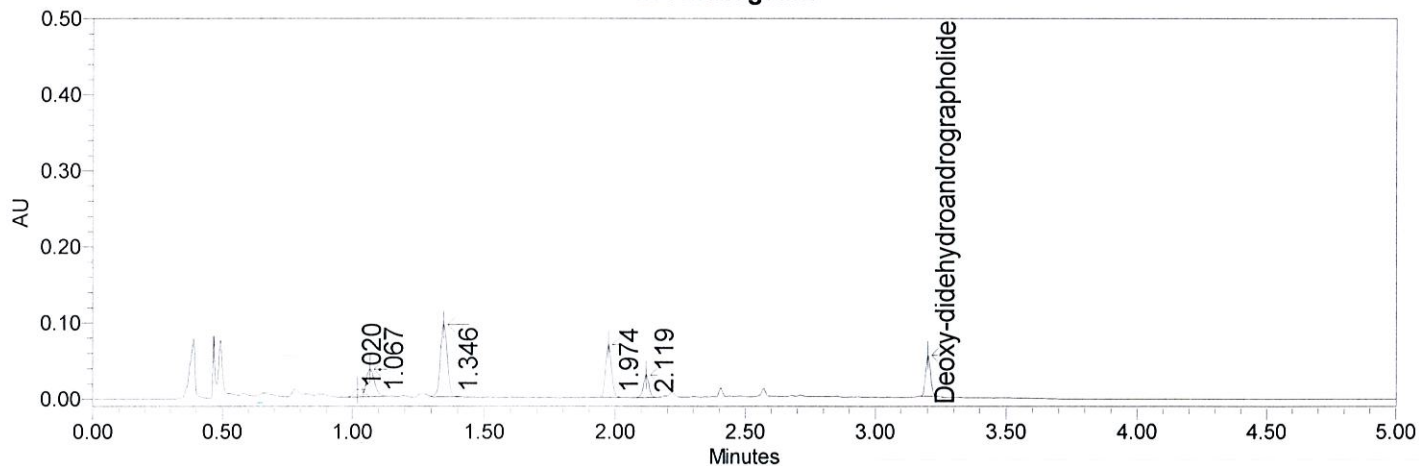

SampleName KJ kaps 50145; Vial 1:A,1; Injection 1; Date Acquired 2011-10-28 10:10:40 CEST; Channel Name 254 nm

**Chromatogram**

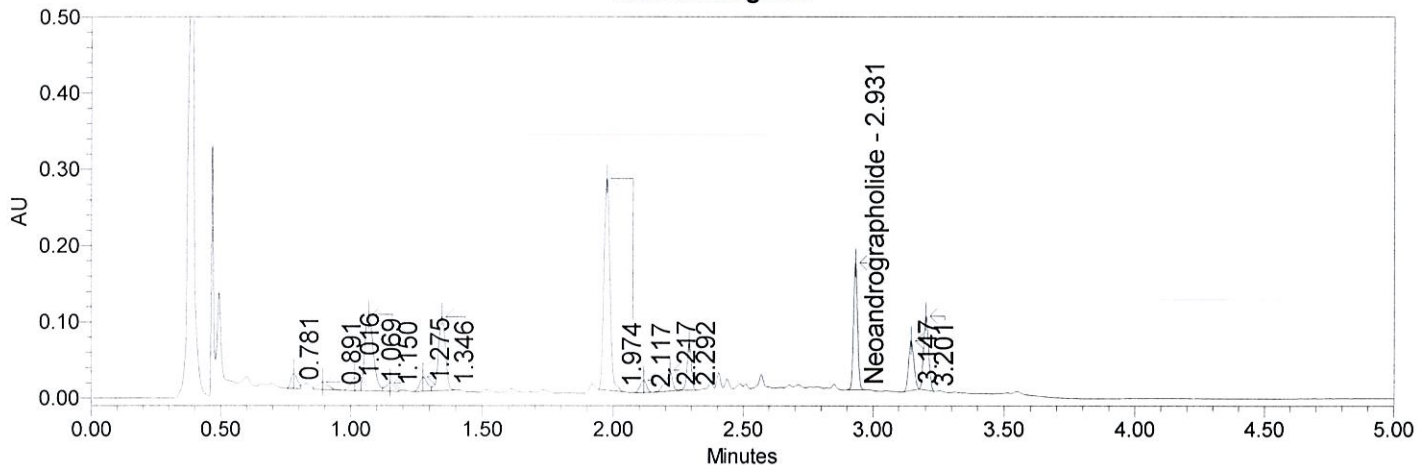

SampleName KJ kaps 50145; Vial 1:A,1; Injection 1; Date Acquired 2011-10-28 10:10:40 CEST; Channel Name 205 nm

Sign: 

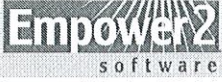

## SampleName KJ kaps 50145

Software Empower 2 Software Build 215

Column no.: 937031

Current Date 2011-11-01

**Eleutherosid B**

Run Time 35.00 Minutes

Processing Method Acanthopanax\_KJT

**Eleutherosid E**

Channel PDA\_210.0nm, PDA\_220.0nm

Start Date 2011-10-31 10:28:24 CET

Tablet\_Weight

Tbi. weight: 342(418)mg

System Name HPLC

### Name: Eleutherosid B

|           | SampleName    | Injection Volume (ul) | SampleWeight | RT    | Area   | Height | Name           | Procent_Amount |
|-----------|---------------|-----------------------|--------------|-------|--------|--------|----------------|----------------|
| 1         | KJ kaps 50145 | 20.00                 | 606.00000    | 6.898 | 777314 | 50588  | Eleutherosid B | 0.0247         |
| 2         | KJ kaps 50145 | 20.00                 | 606.00000    | 7.548 | 774718 | 40082  | Eleutherosid B | 0.0246         |
| 3         | KJ kaps 50145 | 20.00                 | 606.00000    | 7.550 | 786407 | 43669  | Eleutherosid B | 0.0250         |
| Mean      |               |                       |              |       |        |        |                | 0.0248         |
| Std. Dev. |               |                       |              |       |        |        |                | 0.0002         |
| % RSD     |               |                       |              |       |        |        |                | 0.78           |

### Name: Eleutherosid E

|           | SampleName    | Injection Volume (ul) | SampleWeight | RT     | Area    | Height | Name           | Procent_Amount |
|-----------|---------------|-----------------------|--------------|--------|---------|--------|----------------|----------------|
| 1         | KJ kaps 50145 | 20.00                 | 606.00000    | 20.579 | 1147289 | 80158  | Eleutherosid E | 0.0353         |
| 2         | KJ kaps 50145 | 20.00                 | 606.00000    | 21.273 | 1144666 | 74949  | Eleutherosid E | 0.0353         |
| 3         | KJ kaps 50145 | 20.00                 | 606.00000    | 21.279 | 1153406 | 72314  | Eleutherosid E | 0.0355         |
| Mean      |               |                       |              |        |         |        |                | 0.0354         |
| Std. Dev. |               |                       |              |        |         |        |                | 0.0001         |
| % RSD     |               |                       |              |        |         |        |                | 0.39           |

| Results                | mg/tablet    | calculated | % found |
|------------------------|--------------|------------|---------|
| <b>Eleutherosid B:</b> | 0,085 mg/dtl | 0,089      | 96%     |
| <b>Eleutherosid E:</b> | 0,121 mg/dtl | 0,114      | 106%    |
| <b>Eleutherosides:</b> | 0,206 mg/dtl | 0,203      | 101%    |

### Chromatogram

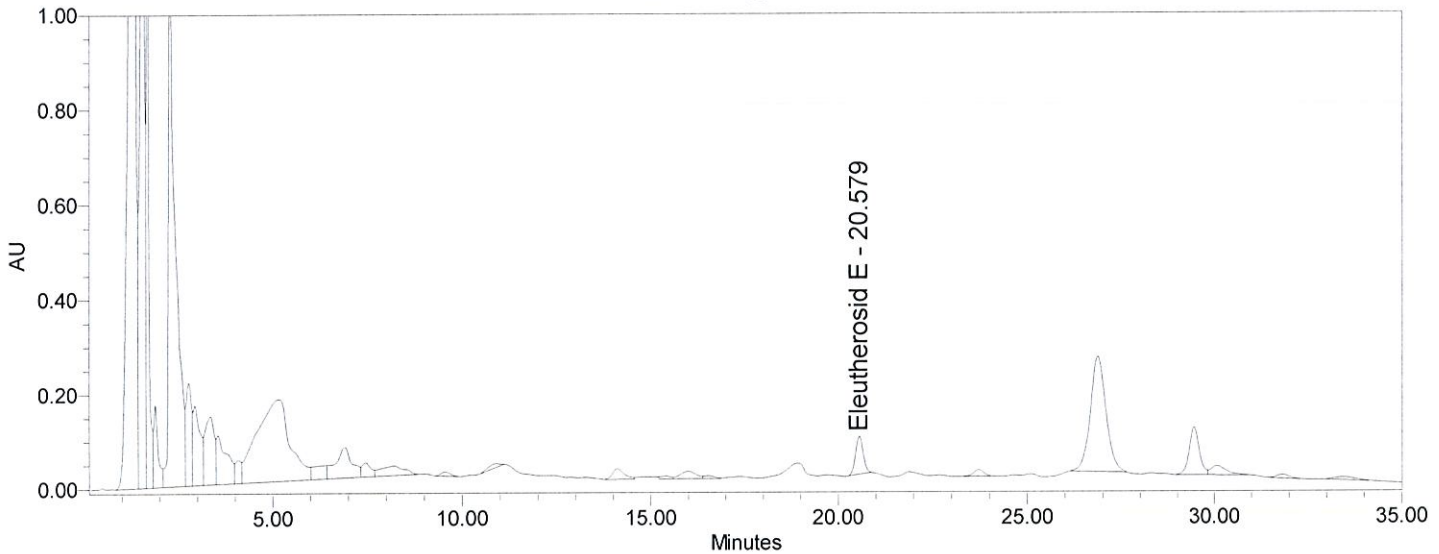

SampleName KJ kaps 50145; Vial 1; Date Acquired 2011-10-31 12:02:06 CET; Channel Name PDA\_210.0nm

Sig.: 



### Chromatogram

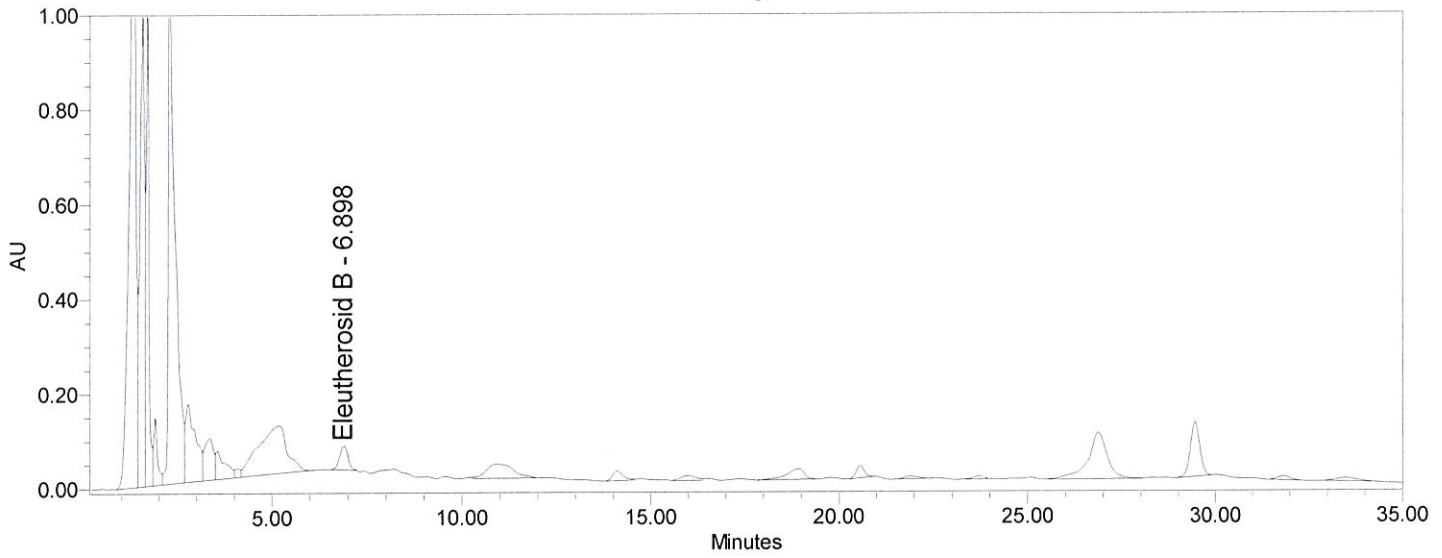

SampleName KJ kaps 50145; Vial 1; Date Acquired 2011-10-31 12:02:06 CET; Channel Name PDA\_220.0nm

### Chromatogram

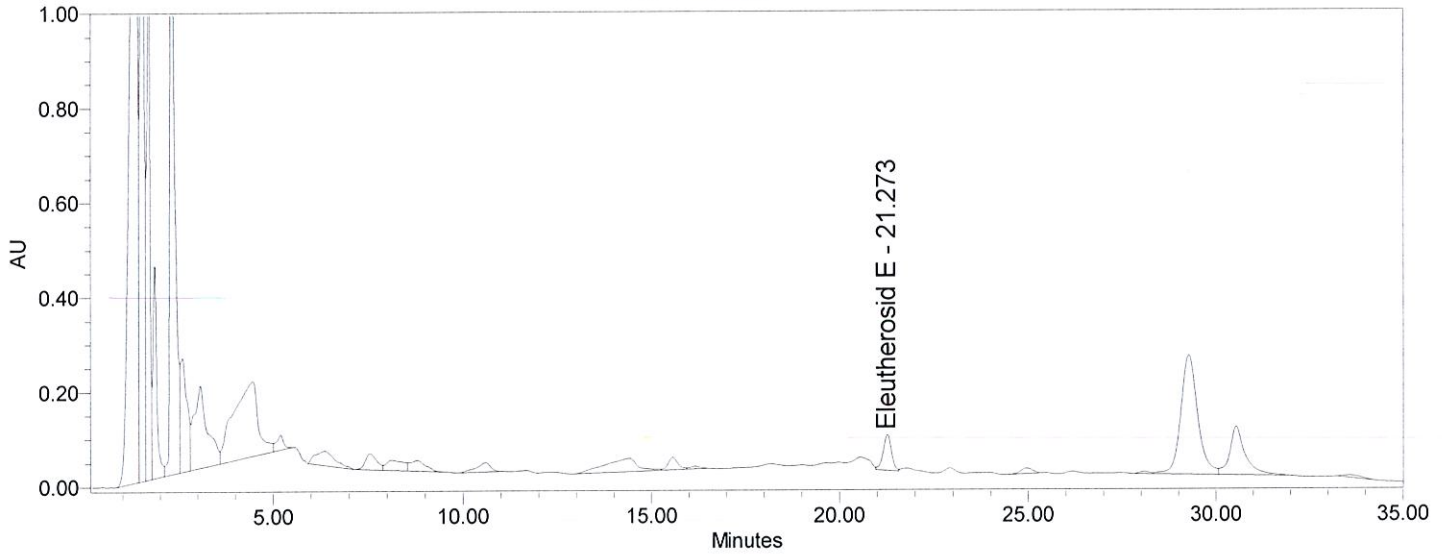

SampleName KJ kaps 50145; Vial 1; Date Acquired 2011-10-31 19:06:22 CET; Channel Name PDA\_210.0nm

Sig.: 

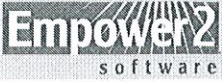

**SampleName KJ kaps 50145**

Software Empower 2 Software Build 215.

Current Date 2011-11-07

**Eleutherosid B**

Column no.: 937031

Processing Method Acanthopanax\_KJT

**Eleutherosid E**

Run Time 35.00 Minutes

Start Date 2011-11-01 13:30:57 CET

Channel PDA\_210.0nm, PDA\_220.0nm

Tablet\_Weight *342 (418) mg*

System Name HPLC

**Name: Eleutherosid B**

|           | SampleName    | Injection Volume (ul) | SampleWeight | RT    | Area   | Height | Name           | Procent_Amount |
|-----------|---------------|-----------------------|--------------|-------|--------|--------|----------------|----------------|
| 1         | KJ kaps 50145 | 20.00                 | 606.00000    | 7.062 | 769506 | 47784  | Eleutherosid B | 0.0245         |
| 2         | KJ kaps 50145 | 20.00                 | 606.00000    | 7.431 | 770998 | 41823  | Eleutherosid B | 0.0245         |
| 3         | KJ kaps 50145 | 20.00                 | 606.00000    | 7.455 | 777146 | 42652  | Eleutherosid B | 0.0247         |
| Mean      |               |                       |              |       |        |        |                | 0.0246         |
| Std. Dev. |               |                       |              |       |        |        |                | 0.0001         |
| % RSD     |               |                       |              |       |        |        |                | 0.52           |

**Name: Eleutherosid E**

|           | SampleName    | Injection Volume (ul) | SampleWeight | RT     | Area    | Height | Name           | Procent_Amount |
|-----------|---------------|-----------------------|--------------|--------|---------|--------|----------------|----------------|
| 1         | KJ kaps 50145 | 20.00                 | 606.00000    | 21.107 | 1130714 | 72690  | Eleutherosid E | 0.0348         |
| 2         | KJ kaps 50145 | 20.00                 | 606.00000    | 21.207 | 1126124 | 73673  | Eleutherosid E | 0.0347         |
| 3         | KJ kaps 50145 | 20.00                 | 606.00000    | 21.223 | 1125963 | 73463  | Eleutherosid E | 0.0347         |
| Mean      |               |                       |              |        |         |        |                | 0.0347         |
| Std. Dev. |               |                       |              |        |         |        |                | 0.0001         |
| % RSD     |               |                       |              |        |         |        |                | 0.24           |

| <b>Results</b>         | <b>mg/tablet</b>     | <b>calculated</b> | <b>% found</b> |
|------------------------|----------------------|-------------------|----------------|
| <b>Eleutherosid B:</b> | <i>0,084 mg /tbl</i> | <i>0,089</i>      | <i>94%</i>     |
| <b>Eleutherosid E:</b> | <i>0,119 mg /tbl</i> | <i>0,114</i>      | <i>104%</i>    |
| <b>Eleutherosides:</b> | <i>0,203 mg /tbl</i> | <i>0,203</i>      | <i>100%</i>    |

**Chromatogram**

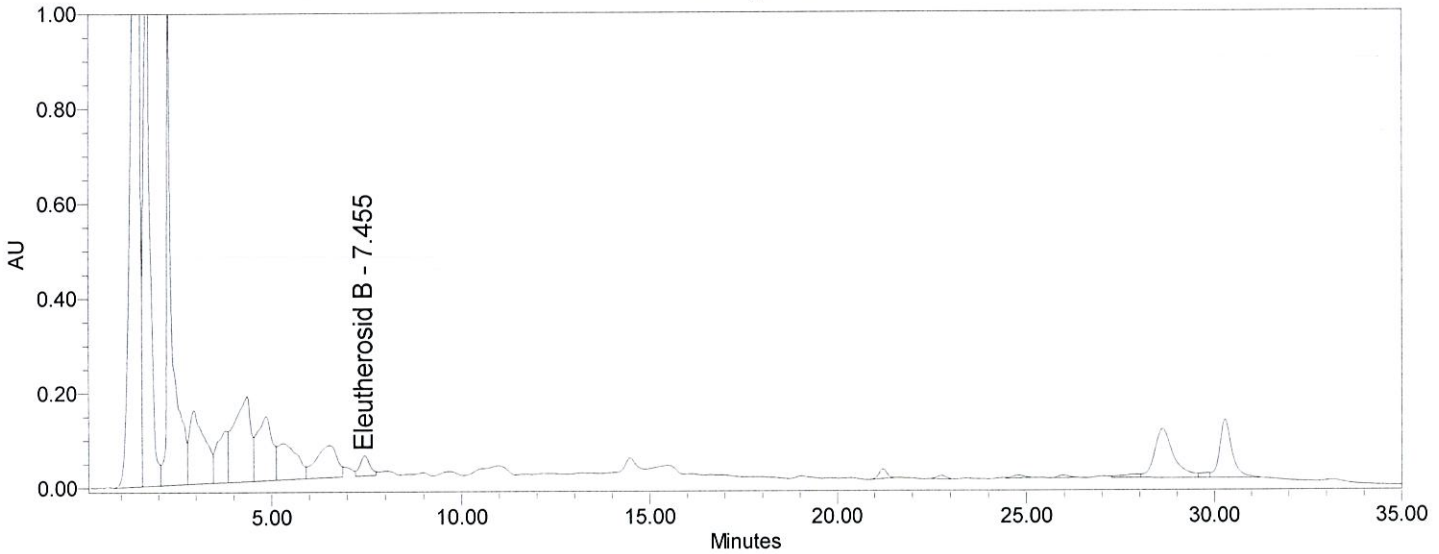

SampleName KJ kaps 50145; Vial 1; Date Acquired 2011-11-02 17:01:52 CET; Channel Name PDA\_220.0nm

Sig.: *[Signature]*

### Chromatogram

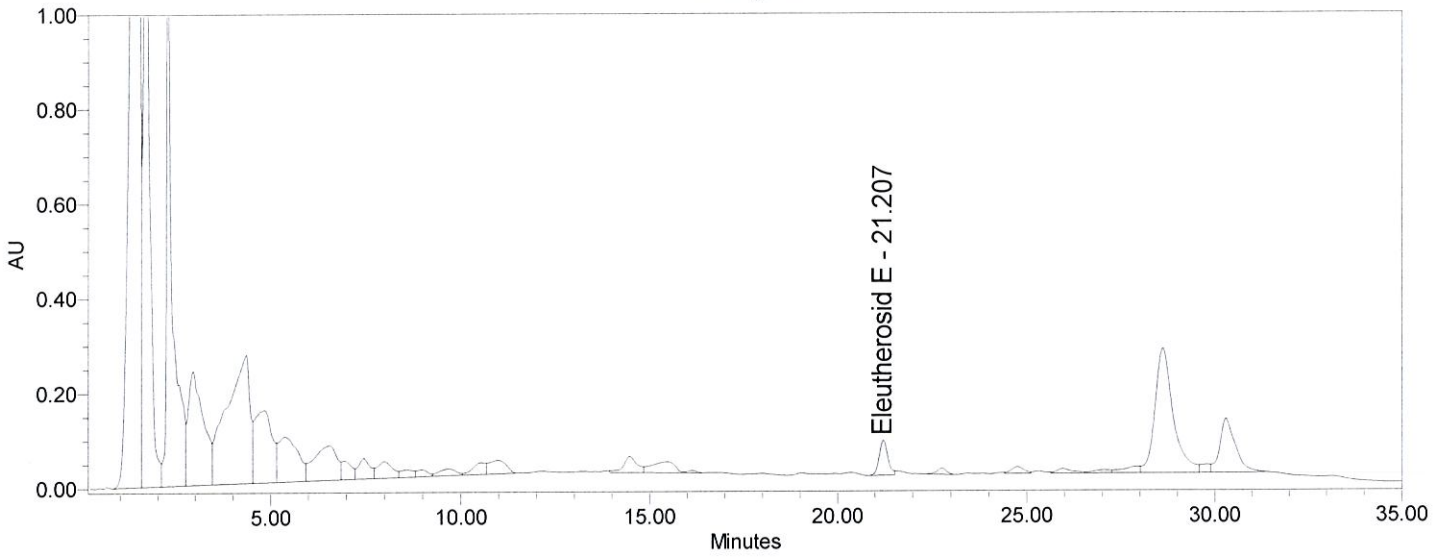

SampleName KJ kaps 50145; Vial 1; Date Acquired 2011-11-02 17:01:52 CET; Channel Name PDA\_210.0nm

### Chromatogram

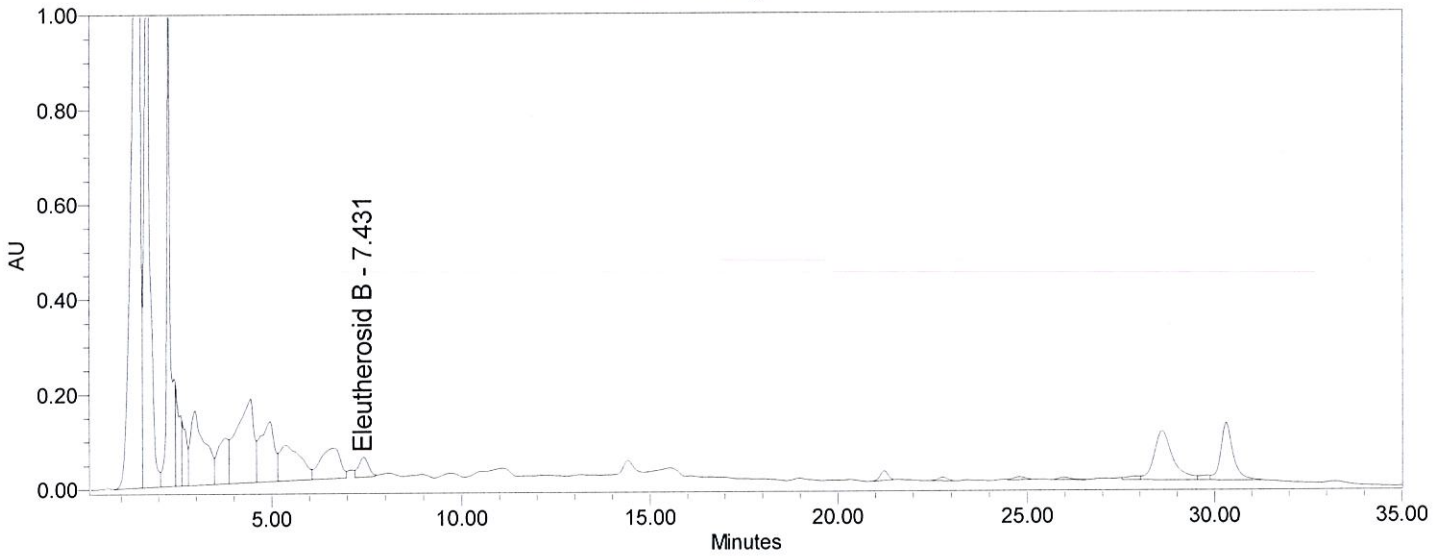

SampleName KJ kaps 50145; Vial 1; Date Acquired 2011-11-02 15:29:28 CET; Channel Name PDA\_220.0nm

Sig.: 

# Certificate of analysis

Capsule: Ken Jong Andrographis Batch no: 50.145

Doc.no:  
ANJC.

Extr. ....  
Extr. ....  
Extr. ....

Bulk batch no: .....

Internal spec. no:  
SP.FV-

| Parameter of analysis    | Method                  | Reference          | Result               |
|--------------------------|-------------------------|--------------------|----------------------|
| Appearance               | Occular                 | SP.FV-             |                      |
| Smell                    | O.L                     | SP.FV-             |                      |
| Total ash                | Ph.Eur.Curr.Ed          |                    | 5%                   |
| Ash, insoluble in HCl    | Ph.Eur.Curr.Ed          |                    | 1%                   |
| Loss on drying           | Ph.Eur.Curr.Ed          |                    | 3%                   |
| Identity (TLC)           | <u>SM-010</u>           | <u>=ref</u>        | <u>=ref</u>          |
| HPLC                     |                         |                    |                      |
| Eleuth B                 | <u>SM-066</u>           |                    | <u>0,084 mg/dcl</u>  |
| Eleuth E                 | <u>SM-066</u>           |                    | <u>0,119 mg/dcl</u>  |
| Σ Eleutherosides         |                         |                    | <u>0,203 mg/dcl</u>  |
| Andrographolide          |                         |                    | <u>8,15 mg/dcl</u>   |
| DDD -andr                |                         |                    | <u>1,50 mg/dcl</u>   |
| Σ Andr + DDD -andr       |                         |                    | <u>9,65 mg/dcl</u>   |
| Neoandr                  |                         |                    | <u>3,44 mg/dcl</u>   |
| Weight including capsule | Ph.Eur.Curr.Ed          | <u>440 ± 33 mg</u> | <u>418 ± 4 mg</u>    |
| Weight without capsule   | -                       | <u>364 ± 27 mg</u> | <u>341 ± 4 mg</u>    |
| Diameter                 | -                       |                    | <u>6,9 ± 0,1 mm</u>  |
| Length                   | -                       |                    | <u>19,3 ± 0,1 mm</u> |
| Disintegration           | Ph.Eur.Curr.Ed (SM-032) | ≤ 30 min           | <u>&lt; 30 min</u>   |
|                          |                         | <b>Reference</b>   | <b>Released</b>      |
| Microbial contamination  | Ph.Eur.Curr.Ed          | Ph.Eur.Cat B       | <u>conform</u>       |

Date of analysis: 111101

Date of release: 20111114

Analyst, sign: no) W

QP-responsible: M

|           |                          |
|-----------|--------------------------|
| Comments: | Manufacturing date:      |
|           | Expiry date (two years): |

PhytoLab GmbH & Co.KG Dutendorfer Straße 5-7 91487 Vestenbergsgreuth

Swedish Herbal Institute  
Eva Vencel  
Kövlingevägen 21  
312 50 Vallberga  
Sweden

PhytoLab GmbH & Co.KG  
Dutendorfer Straße 5-7  
91487 Vestenbergsgreuth  
Germany  
Contact at PhytoLab:  
Annette Reichel  
Tel: +49 9163 88-188  
Fax: +49 9163 88-379  
annette.reichel@phytolab.de

Date: 9.11.11

Cust.No: 91778

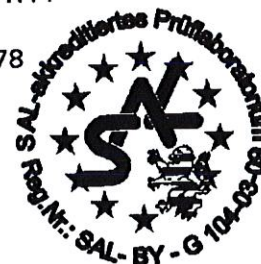

### Certificate of analysis

Report-No.: 13292590- 40 001  
Cust.-lot: 50145  
Sample labelling: Kan Jang capsule  
Sample description: 135 capsules  
Packing: 9x blister  
Receipt of sample: 3.11.11

| Test                                                                                                                                                                                                                                                                                                                                                                                         | Unit  | Limit      | Testresult |
|----------------------------------------------------------------------------------------------------------------------------------------------------------------------------------------------------------------------------------------------------------------------------------------------------------------------------------------------------------------------------------------------|-------|------------|------------|
| Microbiology: Category B, Herbal medicinal products containing, for example, extracts and/ or herbal drugs, with or without excipients, where the method of processing (for example, extraction) or, where appropriate, in the case of herbal drugs, of pre-treatment reduces the levels of organisms to below those stated for this category, according to Ph. Eur. 7.0, 5.1.8, SOP 803911: |       |            | Conform    |
| Total aerobic microbial count (TAMC), Ph. Eur. 7.0, 2.6.12, SOP 300007                                                                                                                                                                                                                                                                                                                       | CFU/g | < = 50,000 | 50         |
| Moulds (quantitative), Ph. Eur. 7.0, 2.6.12, SOP 300014                                                                                                                                                                                                                                                                                                                                      | CFU/g |            | < 10       |
| Yeasts (quantitative), Ph. Eur. 7.0, 2.6.12, SOP 300023                                                                                                                                                                                                                                                                                                                                      | CFU/g |            | 10         |
| Total combined yeasts and moulds count (TYMC), Ph. Eur. 7.0, 2.6.12, SOP 300033                                                                                                                                                                                                                                                                                                              | CFU/g | < = 500    | 10         |
| Bile-tolerant gram-negative bacteria (semiquantitative, PN method), Ph. Eur. 7.0, 2.6.31, SOP 300044                                                                                                                                                                                                                                                                                         | CFU/g | < = 100    | < 10       |
| Escherichia coli (absence test), Ph. Eur.7.0, 2.6.31, SOP 300058                                                                                                                                                                                                                                                                                                                             | /g    | Absent     | Absent     |
| Salmonella (absence test), Ph. Eur. 7.0, 2.6.31, SOP 300122                                                                                                                                                                                                                                                                                                                                  | /25 g | Absent     | Absent     |

Information on the method employed and on method characteristics is available to customers on request. The results apply to the supplied sample. Copying of the document is only permissible without any modification of the document.

**Certificate of analysis**

Report-No.: 13292590- 40 001  
Cust.-lot: 50145  
Sample labelling: Kan Jang capsule

| Test | Unit | Limit | Testresult |
|------|------|-------|------------|
|------|------|-------|------------|

Vestenbergsreuth, 9.11.11



Dr. Claudia Borst

# Kan Jang Andrographis capsules, blister HPTLC 50 145

Method: SM-010

VIS

Ref 3400039  
Test 50145

254nm

366nm

Front

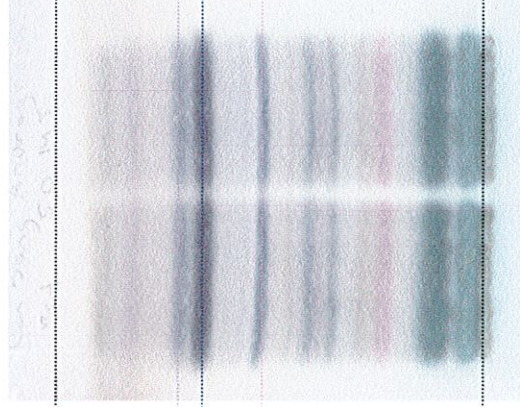

DDD-and  
R<sub>f</sub>: 0,71  
Andr  
R<sub>f</sub>: 0,66  
Neo-and  
R<sub>f</sub>: 0,52

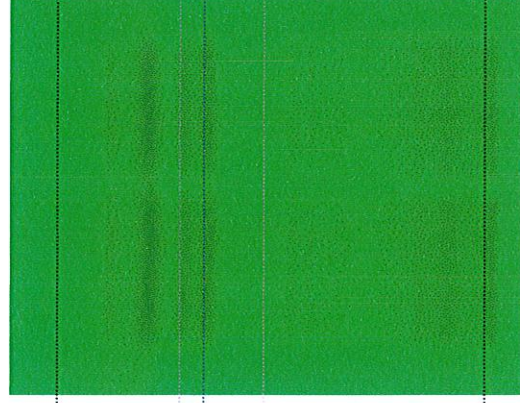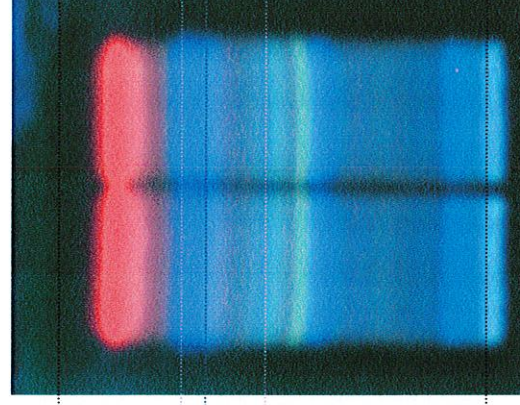

Start

Absorbent: Silica gel 60 F<sub>254</sub> precoated HPTLC plates  
Solvent system: Ethylacetate : methanol : water (38 : 7 : 4)  
Spray reagents: vanillin-sulphuric acid solution

Sign: *Maria*

Date: 2011-11-03

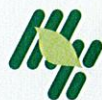

PhytoLab GmbH & Co.KG Dutendorfer Straße 5-7 91487 Vestenbergsgreuth

Swedish Herbal Institute  
Eva Vencel  
Kövlingevägen 21  
312 50 Vallberga  
Sweden

PhytoLab GmbH & Co.KG  
Dutendorfer Straße 5-7  
91487 Vestenbergsgreuth  
Germany  
Contact at PhytoLab:  
Annette Reichel  
Tel: +49 9163 88-188  
Fax: +49 9163 88-379  
annette.reichel@phytolab.de

Date: 9.11.11

Cust.No: 91778

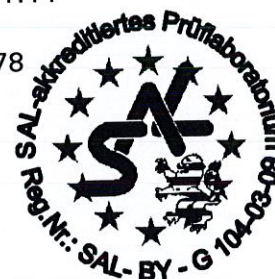

**Certificate of analysis**

Report-No.: 13292590- 40 001  
Cust.-lot: 50145  
Sample labelling: Kan Jang capsule  
Sample description: 135 capsules  
Packing: 9x blister  
Receipt of sample: 3.11.11

| Test                                                                                                                                                                                                                                                                                                                                                                                         | Unit  | Limit      | Testresult |
|----------------------------------------------------------------------------------------------------------------------------------------------------------------------------------------------------------------------------------------------------------------------------------------------------------------------------------------------------------------------------------------------|-------|------------|------------|
| Microbiology: Category B, Herbal medicinal products containing, for example, extracts and/ or herbal drugs, with or without excipients, where the method of processing (for example, extraction) or, where appropriate, in the case of herbal drugs, of pre-treatment reduces the levels of organisms to below those stated for this category, according to Ph. Eur. 7.0, 5.1.8, SOP 803911: |       |            | Conform    |
| Total aerobic microbial count (TAMC), Ph. Eur. 7.0, 2.6.12, SOP 300007                                                                                                                                                                                                                                                                                                                       | CFU/g | < = 50,000 | 50         |
| Moulds (quantitative), Ph. Eur. 7.0, 2.6.12, SOP 300014                                                                                                                                                                                                                                                                                                                                      | CFU/g |            | < 10       |
| Yeasts (quantitative), Ph. Eur. 7.0, 2.6.12, SOP 300023                                                                                                                                                                                                                                                                                                                                      | CFU/g |            | 10         |
| Total combined yeasts and moulds count (TYMC), Ph. Eur. 7.0, 2.6.12, SOP 300033                                                                                                                                                                                                                                                                                                              | CFU/g | < = 500    | 10         |
| Bile-tolerant gram-negative bacteria (semiquantitative, PN method), Ph. Eur. 7.0, 2.6.31, SOP 300044                                                                                                                                                                                                                                                                                         | CFU/g | < = 100    | < 10       |
| Escherichia coli (absence test), Ph. Eur.7.0, 2.6.31, SOP 300058                                                                                                                                                                                                                                                                                                                             | /g    | Absent     | Absent     |
| Salmonella (absence test), Ph. Eur. 7.0, 2.6.31, SOP 300122                                                                                                                                                                                                                                                                                                                                  | /25 g | Absent     | Absent     |

Information on the method employed and on method characteristics is available to customers on request. The results apply to the supplied sample. Copying of the document is only permissible without any modification of the document.



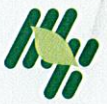

**Certificate of analysis**

Report-No.: 13292590- 40 001  
Cust.-lot: 50145  
Sample labelling: Kan Jang capsule

| Test | Unit | Limit | Testresult |
|------|------|-------|------------|
|------|------|-------|------------|

Vestenbergsreuth, 9.11.11

Dr. Claudia Borst

2011.11.15 / BW

## Certificate of analysis

Product: **Andrographis pan. extr. siccum**

Batch no: 152114

Internal spec. no

Batch no., previous extract: 1421047

Batch no., drug: 1010247

SP EX-001

| Parameter of analysis                   | Method                 | Reference      | Result  |
|-----------------------------------------|------------------------|----------------|---------|
| Appearance                              | Occular                | SP.EX-001      | = ref   |
| Loss on drying                          | Ph.Eur.Curr.Ed         | ≤ 5%           | 2%      |
| pH in 5% H <sub>2</sub> O-solution      | Ph.Eur.Curr.Ed         | 5 - 7          | 6       |
| Identity TLC                            | SM-010                 | = ref          | = ref   |
| Andrographolide                         | SM-118                 | - %            | 3,38%   |
| 14-deoxy-11,12-didehydroandrographolide | SM-118                 | - %            | 0,64%   |
| Σ Andrographolides                      | SM-118                 | 4.2-8.4%       | 4,02%   |
| Σ Andrographolides in native extract    | SM-118                 | 6.0-14.0%      | 6,93%   |
| Neoandrographolide                      | SM-118                 | n.a.           | 1,49%   |
| Methylparahydroxybenzoate               | SM-121                 | 0.2-0.6%       | 0,35%   |
| Nativ ratio                             | SM-087                 | 4.5-8.0 : 1    | 6,7 : 1 |
| Microbiology                            | Ph.Eur Curr.Ed. 5.1.8  | Ph. Eur. Cat B | conform |
| Ethanol                                 | Ph.Eur.Curr.Ed. 2.4.24 | ≤ 2%           | 0,9%    |

Date of analysis 2011. 10. 21

Date of release 2011 10 31

Analyst signature bu/mo

QP-responsible MF

Comments: Ratio: 3,9 : 1  
\* Andrographolides are out of limits, but in the nativ extract are in the limits. ✓

Manufacturing date  
2011. 10. 18  
Expiry date (three years)  
2014 - 11

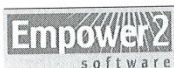

Sample Name:  
Andr 1521114

Rapport\_extrakt

Method: SM-121  
Sample Type: Unknown  
Vial: 1:A,1  
Injection #: 1, 2, 3  
Injection Volume: 2.00 ul  
Run Time: 4.5 Minutes  
Sample Set Name: Andr 114 047

Acquired By: EvaV  
Date Acquired: 2013-03-08 13:54:49 CET,  
Acq. Method Set: Kons med andr  
Date Processed: 2013-03-08 14:09:51 CET,  
Processing Method: Kons med andr  
Channel Name: 256 nm  
Column no.: 01363035115404

Component Results  
SampleName: Andr 1521114

|           | SampleName   | Vial  | Inj | SampleWeight | Dilution | RT    | Area   | Height | Name                     | Percent_amount |
|-----------|--------------|-------|-----|--------------|----------|-------|--------|--------|--------------------------|----------------|
| 1         | Andr 1521114 | 1:A,1 | 3   | 7.61000      | 1.00000  | 2.867 | 653670 | 191651 | Methyl-4-hydroxybenzoate | 0.3491         |
| 2         | Andr 1521114 | 1:A,1 | 1   | 7.61000      | 1.00000  | 2.868 | 656709 | 191503 | Methyl-4-hydroxybenzoate | 0.3507         |
| 3         | Andr 1521114 | 1:A,1 | 2   | 7.61000      | 1.00000  | 2.873 | 654695 | 191117 | Methyl-4-hydroxybenzoate | 0.3496         |
| Mean      |              |       |     |              |          | 2.87  | 655025 |        |                          | 0.350          |
| Std. Dev. |              |       |     |              |          | 0.00  | 1546   |        |                          | 0.001          |
| % RSD     |              |       |     |              |          | 0.1   | 0.2    |        |                          | 0.2            |

| Result                    | %     | Calculated | % Found |
|---------------------------|-------|------------|---------|
| Methyl-4-hydroxybenzoate: | 0,35% | 0,365%     | 96%     |

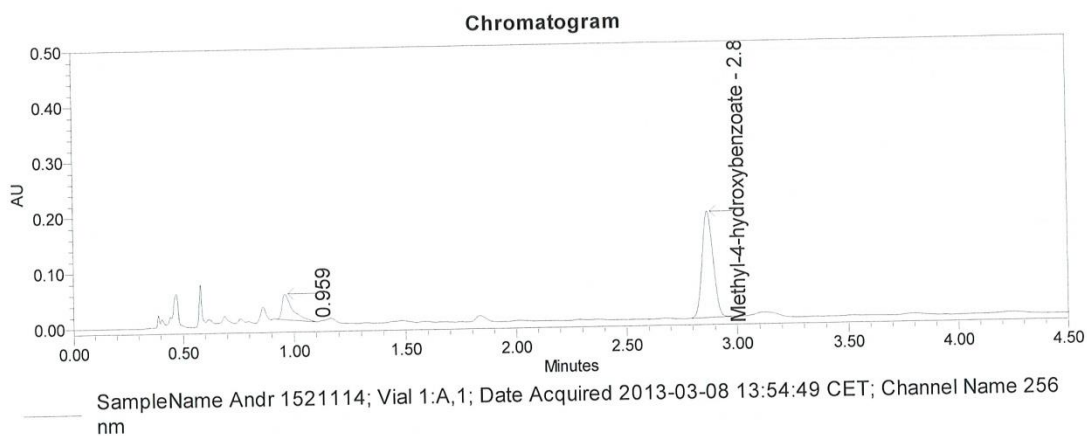

Sign.: 

**Andrographis siccum**  
HPTLC  
**15 21114**

Method: SM-010

VIS

Ref  
087

Test  
114

254nm

366nm

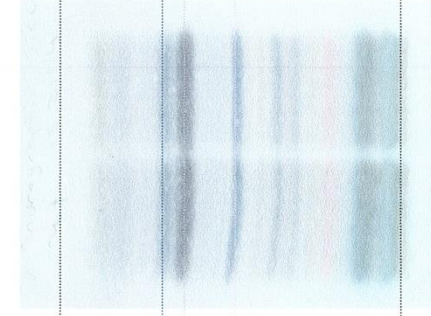

DDD-and  
R<sub>f</sub>: 0,70  
Andr  
R<sub>f</sub>: 0,64  
Neo-and  
R<sub>f</sub>: 0,48

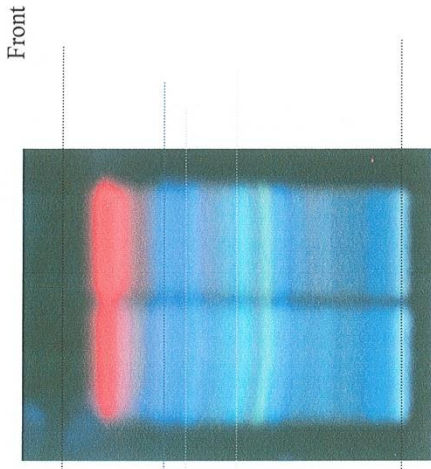

Front

Start

Absorbent: Silica gel 60 F<sub>254</sub> precoated HPTLC plates  
Solvent system: Ethylacetate : methanol : water (38 : 7 : 4)  
Spray reagents: vanillin-sulphuric acid solution

Sign: *Mattias*

Date: 2011-10-21

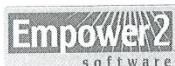

Processing Method Andrographis

Start Date 2011-10-24 10:55:58 CEST

**SampleName Andr 1521114**

**Name Andrographolide,  
Deoxy-didehydroandrographolide,  
Neoandrographolide**

Current Date 2011-10-24

Software Empower 2 Software Build 2154

Column no.: Acquity UPLC BEH C18 1.7µm  
01773000715504

Channel 205 nm, 223 nm, 254 nm

Run Time 5.00 Minutes

**Component Results  
Name: Andrographolide**

|           | SampleName   | Vial  | Injection | SampleWeight | RT    | Area   | Height | Name            | Percent_amount |
|-----------|--------------|-------|-----------|--------------|-------|--------|--------|-----------------|----------------|
| 1         | Andr 1521114 | 1:A,4 | 3         | 2.10560      | 1.968 | 479849 | 298198 | Andrographolide | 3.381          |
| 2         | Andr 1521114 | 1:A,4 | 1         | 2.10560      | 1.970 | 479741 | 298176 | Andrographolide | 3.381          |
| 3         | Andr 1521114 | 1:A,4 | 2         | 2.10560      | 1.971 | 480825 | 299764 | Andrographolide | 3.388          |
| Mean      |              |       |           |              |       |        |        |                 | 3.383          |
| Std. Dev. |              |       |           |              |       |        |        |                 | 0.004          |
| % RSD     |              |       |           |              |       |        |        |                 | 0.12           |

**Component Results  
Name: Neoandrographolide**

|           | SampleName   | Vial  | Injection | SampleWeight | RT    | Area   | Height | Name               | Percent_amount |
|-----------|--------------|-------|-----------|--------------|-------|--------|--------|--------------------|----------------|
| 1         | Andr 1521114 | 1:A,4 | 3         | 2.10560      | 2.919 | 177917 | 159208 | Neoandrographolide | 1.487          |
| 2         | Andr 1521114 | 1:A,4 | 2         | 2.10560      | 2.919 | 178163 | 159333 | Neoandrographolide | 1.489          |
| 3         | Andr 1521114 | 1:A,4 | 1         | 2.10560      | 2.920 | 177943 | 159193 | Neoandrographolide | 1.487          |
| Mean      |              |       |           |              |       |        |        |                    | 1.487          |
| Std. Dev. |              |       |           |              |       |        |        |                    | 0.001          |
| % RSD     |              |       |           |              |       |        |        |                    | 0.08           |

**Component Results  
Name: Deoxy-didehydroandrographolide**

|           | SampleName   | Vial  | Injection | SampleWeight | RT    | Area  | Height | Name                           | Percent_amount |
|-----------|--------------|-------|-----------|--------------|-------|-------|--------|--------------------------------|----------------|
| 1         | Andr 1521114 | 1:A,4 | 3         | 2.10560      | 3.186 | 72694 | 52211  | Deoxy-didehydroandrographolide | 0.641          |
| 2         | Andr 1521114 | 1:A,4 | 2         | 2.10560      | 3.187 | 72912 | 52385  | Deoxy-didehydroandrographolide | 0.643          |
| 3         | Andr 1521114 | 1:A,4 | 1         | 2.10560      | 3.188 | 72656 | 52187  | Deoxy-didehydroandrographolide | 0.641          |
| Mean      |              |       |           |              |       |       |        |                                | 0.642          |
| Std. Dev. |              |       |           |              |       |       |        |                                | 0.001          |
| % RSD     |              |       |           |              |       |       |        |                                | 0.19           |

**Results** \_\_\_\_\_ **%**

**Andrographolide:** \_\_\_\_\_ **3,38%**

**Neoandrographolide:** \_\_\_\_\_ **1,49%**

**Deoxy-11,12-didehydroandrographolide:** \_\_\_\_\_ **0,64%**

**Total :** \_\_\_\_\_ **5,51%**

Sign: \_\_\_\_\_

**Chromatogram**

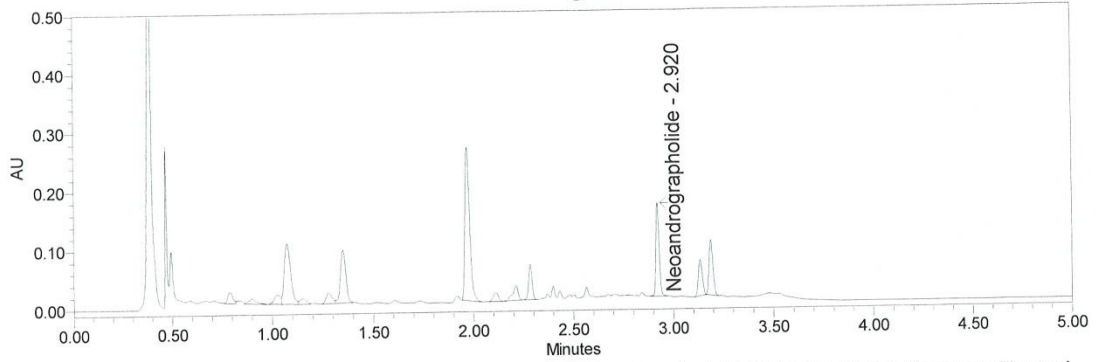

SampleName Andr 1521114; Vial 1:A,4; Injection 1; Date Acquired 2011-10-24 11:49:48 CEST; Channel Name 205 nm

**Chromatogram**

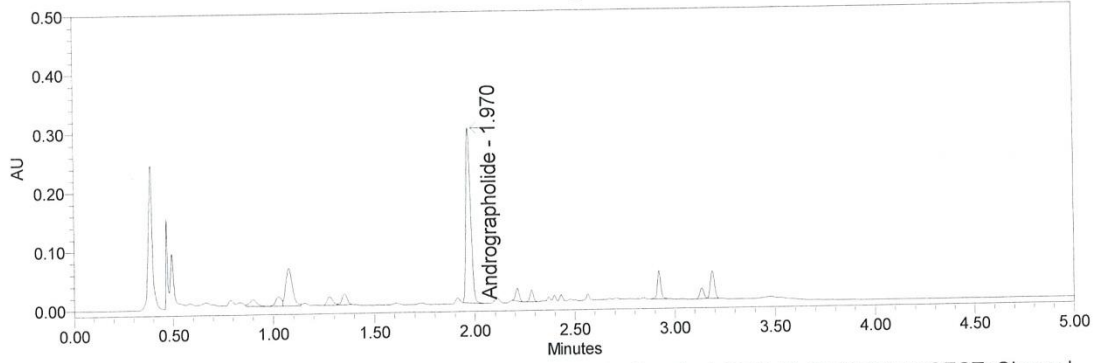

SampleName Andr 1521114; Vial 1:A,4; Injection 1; Date Acquired 2011-10-24 11:49:48 CEST; Channel Name 223 nm

**Chromatogram**

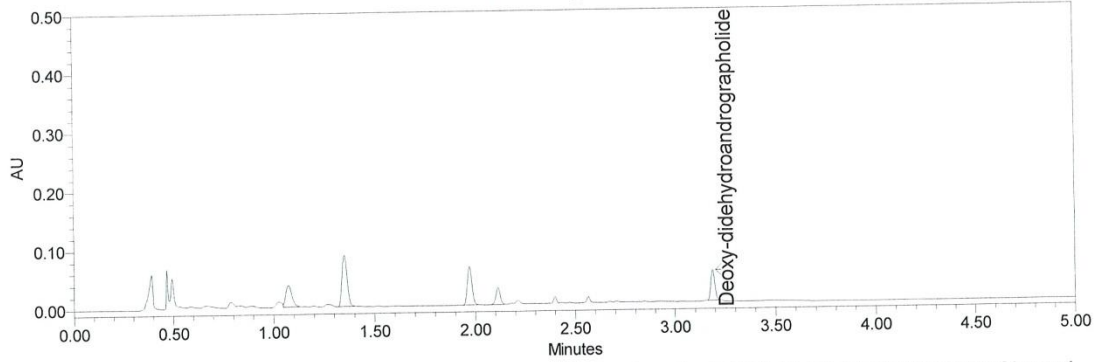

SampleName Andr 1521114; Vial 1:A,4; Injection 1; Date Acquired 2011-10-24 11:49:48 CEST; Channel Name 254 nm

Sign: 

PhytoLab GmbH & Co.KG Dutendorfer Straße 5-7 91487 Vestenbergsgreuth

Swedish Herbal Institute  
Eva Vencel  
Kövlingevägen 21  
312 50 Vallberga  
Sweden

PhytoLab GmbH & Co.KG  
Dutendorfer Straße 5-7  
91487 Vestenbergsgreuth  
Germany  
Contact at PhytoLab:  
Annette Reichel  
Tel: +49 9163 88-188  
Fax: +49 9163 88-379  
annette.reichel@phytolab.de

Date: 31.10.11

Cust.No: 91778

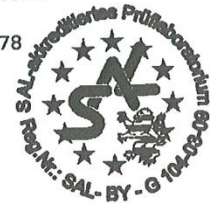

**Certificate of analysis**

Report-No.: 13248486- 40 001  
Cust.-lot: 15 21114  
Sample labelling: Andrographis siccum  
Sample description: green, fine powder  
Packing: pe container with screw closure  
Receipt of sample: 21.10.11

| Test                                                                                                                                                                                                                                                                                                                                                                                         | Unit  | Limit      | Testresult |
|----------------------------------------------------------------------------------------------------------------------------------------------------------------------------------------------------------------------------------------------------------------------------------------------------------------------------------------------------------------------------------------------|-------|------------|------------|
| Microbiology: Category B, Herbal medicinal products containing, for example, extracts and/ or herbal drugs, with or without excipients, where the method of processing (for example, extraction) or, where appropriate, in the case of herbal drugs, of pre-treatment reduces the levels of organisms to below those stated for this category, according to Ph. Eur. 7.0, 5.1.8, SOP 803911: |       |            | Conform    |
| Total aerobic microbial count (TAMC), Ph. Eur. 7.0, 2.6.12, SOP 300007                                                                                                                                                                                                                                                                                                                       | CFU/g | < = 50,000 | 50         |
| Moulds (quantitative), Ph. Eur. 7.0, 2.6.12, SOP 300014                                                                                                                                                                                                                                                                                                                                      | CFU/g |            | < 10       |
| Yeasts (quantitative), Ph. Eur. 7.0, 2.6.12, SOP 300023                                                                                                                                                                                                                                                                                                                                      | CFU/g |            | < 10       |
| Total combined yeasts and moulds count (TYMC), Ph. Eur. 7.0, 2.6.12, SOP 300033                                                                                                                                                                                                                                                                                                              | CFU/g | < = 500    | < 10       |
| Bile-tolerant gram-negative bacteria (semiquantitative, PN method), Ph. Eur. 7.0, 2.6.31, SOP 300044                                                                                                                                                                                                                                                                                         | CFU/g | < = 100    | < 10       |
| Escherichia coli (absence test), Ph. Eur.7.0, 2.6.31, SOP 300058                                                                                                                                                                                                                                                                                                                             | /g    | Absent     | Absent     |
| Salmonella (absence test), Ph. Eur. 7.0, 2.6.31, SOP 300122                                                                                                                                                                                                                                                                                                                                  | /25 g | Absent     | Absent     |

Information on the method employed and on method characteristics is available to customers on request. The results apply to the supplied sample. Copying of the document is only permissible without any modification of the document.

**Certificate of analysis**

Report-No.: 13248486- 40 001  
Cust.-lot: 15 21114  
Sample labelling: Andrographis siccum

| Test | Unit | Limit | Testresult |
|------|------|-------|------------|
|------|------|-------|------------|

Vestenbergsreuth, 31.10.11



Dr. Claudia Borst

2011.10.31 / h/v



PhytoLab GmbH & Co.KG Dutendorfer Straße 5-7 91487 Vestenbergsgreuth

Swedish Herbal Institute  
Eva Vencel  
Kövlingevägen 21  
312 50 Vallberga  
Sweden

PhytoLab GmbH & Co.KG  
Dutendorfer Straße 5-7  
91487 Vestenbergsgreuth  
Germany  
Contact at PhytoLab:  
Annette Reichel  
Tel: +49 9163 88-188  
Fax: +49 9163 88-379  
annette.reichel@phytolab.de

Date: 31.10.11

Cust.No: 91778

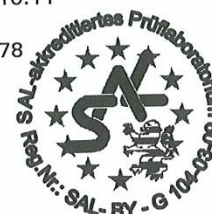

### Certificate of analysis

Report-No.: 13248486- 40001  
Cust.-lot: 15 21114  
Sample labelling: Andrographis siccum  
Sample description: green, fine powder  
Packing: pe container with screw closure  
Receipt of sample: 21.10.11

| Test                                                                                                                                                                                                                                                                                                                                                                                         | Unit  | Limit      | Testresult |
|----------------------------------------------------------------------------------------------------------------------------------------------------------------------------------------------------------------------------------------------------------------------------------------------------------------------------------------------------------------------------------------------|-------|------------|------------|
| Microbiology: Category B, Herbal medicinal products containing, for example, extracts and/ or herbal drugs, with or without excipients, where the method of processing (for example, extraction) or, where appropriate, in the case of herbal drugs, of pre-treatment reduces the levels of organisms to below those stated for this category, according to Ph. Eur. 7.0, 5.1.8, SOP 803911: |       |            | Conform    |
| Total aerobic microbial count (TAMC), Ph. Eur. 7.0, 2.6.12, SOP 300007                                                                                                                                                                                                                                                                                                                       | CFU/g | < = 50,000 | 50         |
| Moulds (quantitative), Ph. Eur. 7.0, 2.6.12, SOP 300014                                                                                                                                                                                                                                                                                                                                      | CFU/g |            | < 10       |
| Yeasts (quantitative), Ph. Eur. 7.0, 2.6.12, SOP 300023                                                                                                                                                                                                                                                                                                                                      | CFU/g |            | < 10       |
| Total combined yeasts and moulds count (TYMC), Ph. Eur. 7.0, 2.6.12, SOP 300033                                                                                                                                                                                                                                                                                                              | CFU/g | < = 500    | < 10       |
| Bile-tolerant gram-negative bacteria (semiquantitative, PN method), Ph. Eur. 7.0, 2.6.31, SOP 300044                                                                                                                                                                                                                                                                                         | CFU/g | < = 100    | < 10       |
| Escherichia coli (absence test), Ph. Eur.7.0, 2.6.31, SOP 300058                                                                                                                                                                                                                                                                                                                             | /g    | Absent     | Absent     |
| Salmonella (absence test), Ph. Eur. 7.0, 2.6.31, SOP 300122                                                                                                                                                                                                                                                                                                                                  | /25 g | Absent     | Absent     |

Information on the method employed and on method characteristics is available to customers on request. The results apply to the supplied sample. Copying of the document is only permissible without any modification of the document.

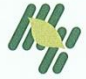

**Certificate of analysis**

Report-No.: 13248486- 40001  
Cust.-lot: 15 21114  
Sample labelling: Andrographis siccum

| Test | Unit | Limit | Testresult |
|------|------|-------|------------|
|------|------|-------|------------|

Vestenbergsreuth, 31.10.11

*C Borst*

Dr. Claudia Borst

Svenska Örtmedicinska Institutet  
Eva Vencel  
Kovlingevägen 21  
SE-312 50 Vallberga

Eurofins Pharma A/S  
Strandesplanaden 110  
DK-2655 Vallensbæk Strand  
Denmark

Tel. +45 70 22 42 66  
Fax +45 70 22 42 55  
[eurofins@eurofins.dk](mailto:eurofins@eurofins.dk)  
[www.eurofins.dk](http://www.eurofins.dk)

Date  
02 November 2011  
Our ref.  
942687/SLH

## Analytical report

|                 |                            |
|-----------------|----------------------------|
| Sample received | Test sample                |
| 20 October 2011 | Andrograhis extract siccum |

Customer's journal no/ project title:

-

Label(s): Batch no. 15 21114

Information from client: -

---

Methods: Specific references are listed with the test results

Reference: -

Results: Results are reported on page 2-3

Comments: Samples are analysed by the laboratory:  
Dr. Fintelmann und Dr. Meyer, GMBH, Germany

---

Signatures

  
Sandy Leth  
MSc (Pharm)

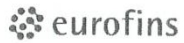

**Fintelmann und Meyer GMP GmbH**

Eurofins Fintelmann und Meyer GMP GmbH  
Großmoorbogen 25  
D-21079 Hamburg  
GERMANY

Eurofins Fintelmann und Meyer GMP GmbH | Großmoorbogen 25 | D-21079 Hamburg

Svenska Örtmedicinska Institutet  
attn. Mrs. Eva Vencel  
Kövlingsvägen 21  
31250  
SCHWEDEN

Tel: +49 40 49 294 670  
Fax: +49 40 49 294 699

info@fintelmann-meyer.de  
www.fintelmann-meyer.de

Report date 01.11.2011  
Page 1/2

**Analytical report** AR-11-FG-009993-01

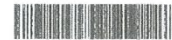

**Sample Code** 714-2011-00017541

|                              |                                                                 |
|------------------------------|-----------------------------------------------------------------|
| <b>Reference</b>             | Andrographis extract siccum<br>Batch nr. 15 21114<br>19.10.2011 |
| <b>Sample sender</b>         | Mrs. Eva Vencel                                                 |
| <b>Prescriber</b>            | Eurofins Pharma A/S                                             |
| <b>Reception date time</b>   | 21.10.2011                                                      |
| <b>Client sample code</b>    | 9426-8701                                                       |
| <b>Packaging</b>             | plastic container                                               |
| <b>Reception temperature</b> | room temperature                                                |
| <b>Storage conditions</b>    | room temperature                                                |
| <b>Start analysis</b>        | 21.10.2011                                                      |
| <b>End analysis</b>          | 01.11.2011                                                      |

**Test results**

|                |                                       |     |   |
|----------------|---------------------------------------|-----|---|
| <b>FGL15</b>   | <b>Ethanol</b>                        |     |   |
| <b>Method</b>  | EP 7.2, on the basis of method 2.4.24 |     |   |
| <b>Ethanol</b> |                                       | 0.9 | % |

**JUDGEMENT**

With regard to the analysed parameters the tested sample material meets the respective requirements of the customer.

"Analysis required by Eurofins Pharma A/S"

The results of examination refer exclusively to the checked samples.  
Duplicates - even in parts - must be submitted by the test laboratory to archive form.  
Eurofins Fintelmann und Meyer GMP GmbH | Großmoorbogen 25 | D-21079 Hamburg  
Business Unit Manager: Dr. Heide Hoyer-Horst | Dr. Jutta-Bär Baranek | Please if performance shall be Hamburg,  
Germany. Place of jurisdiction shall be Hamburg, Germany.  
Our General Terms & Conditions of Sales are applicable.  
VAT No.: DE 399767948  
Nondiscriminatory Lendingbank Hannover - Kfz. Nr. 121 394 626 - IBZ 2 769 300 09 | BIK: 250205050000110356125  
BIC: NOLADE33XXX  
Our General Terms & Conditions of Sales are applicable.

Signature



Dr. H. Neumann-Hensel / B. Kohnke / K. Oelkers / Dr. T. Rathjen  
(General manager) (Department management)

 eurofins  
Eurofins Pharma AG  
Strandsepland 100  
29655 Valentinshafen  
Tel. 70 22 45 80

2011.11.02

The results of observation or for suitability for the checked samples.  
Duplications - even in parts - must be achieved by the test laboratory in written form.  
Eurofins Fintelmann und Meyer GMP GmbH - Ombudsmann 25 - D-31078 Harburg  
Business Unit Manager: Dr. Heide Kuhnert-Hensel / Dr. Andrea Treichel-Hensel. Place of performance shall be Harburg,  
Germany. Place of jurisdiction shall be Harburg, Germany.  
Our General Terms & Conditions of Sales are applicable.  
VAT No.: DE 259792648  
Wirtschaftskammer Hannover - Vst. Nr.: 151 354 425 - St. Z 290 500 33 - IAN: DE992569033161335825  
BIC: NOLAE233000  
Our General Terms & Conditions of Sales are applicable.

2011. 11.02 / *SN*

# Certificate of analysis

Doc. no.

ANJE.003

Internal spec. no.

SP.EX-003E

Product:

Batch no.: 15 21077.....

**Eleutherococcus sent. extr. siccum**

Batch no., previous extract: 1421061.....

Batch no., drug: 1010237.....

| Parameter of analysis              | Method         | Reference                | Result        |
|------------------------------------|----------------|--------------------------|---------------|
| Appearance                         | Occular        | = ref                    | = ref         |
| Loss on drying                     | Ph Eur Curr Ed | < 5%                     | 1,0%          |
| pH in 5% H <sub>2</sub> O-solution | Ph Eur Curr Ed | 4,5 - 6                  | 5,03          |
| Identity (TLC)                     | SM-018         | = ref                    | = ref         |
| Identity of markers                | SM-094         | =standards               | = ref         |
| <b>HPLC</b>                        |                |                          |               |
| Eleutherosid B + E in native       | SM-073         | 1,2-2,9%                 | 1,78%         |
| Eleutherosid B + E in total extr.  |                |                          | 0,89%         |
| Potassium sorbate                  | SM-046         | 0,05-0,25%               | 0,10%         |
| Mettylparahydroxybensoat           | SM-046         | 0,05-0,25%               | 0,09%         |
|                                    |                |                          |               |
|                                    |                | <b>Reference</b>         | <b>Result</b> |
| Ratio                              |                |                          | 9:1           |
| Nativ ratio                        |                | 17 - 30:1                | 17:1          |
|                                    |                | <b>Reference</b>         | <b>Result</b> |
| Microbiology                       | PhEur Curr Ed  | Ph. Eur. Cat 3B          | Conform       |
| Ethanol                            | PhEur Curr Ed  | <1% <sup>1005.02/4</sup> | <1%           |

Date of analysis: 11.02.16.....

Date of release: 2011-03-08.....

Analyst signature: [Signature].....

QP-responsible: [Signature].....

|           |                                                 |
|-----------|-------------------------------------------------|
| Comments: | Manufacturing date<br><u>2011.02.17</u> .....   |
|           | Expiry date (two years)<br><u>2013-03</u> ..... |

|                     |                                      |                           |                   |
|---------------------|--------------------------------------|---------------------------|-------------------|
| Checked by: (QC)    | Eva Vencel <u>[Signature]</u>        | Date: <u>08.10.21</u> ... | Issue no: 11      |
| Authorised by (QA): | Charlotte Nilsson <u>[Signature]</u> | Date: <u>08.10.21</u> ... | Supersedes no: 10 |
| Authorised by (QP): | Dan Magnusson <u>[Signature]</u>     | Date: <u>08.10.21</u>     |                   |

# Eleutherococcus siccum TLC 15 21077

Metod: SM-018

VIS

Ref 888  
Test 077

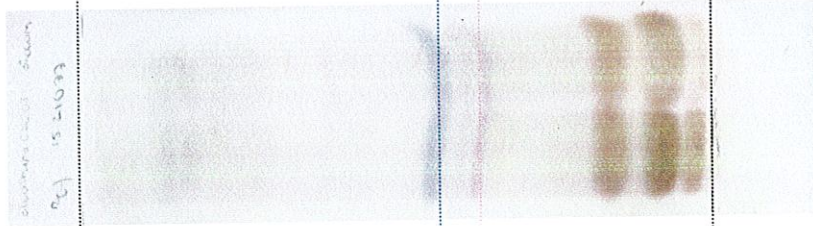

254nm

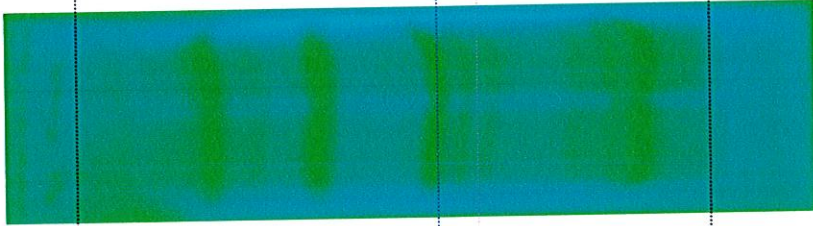

366nm

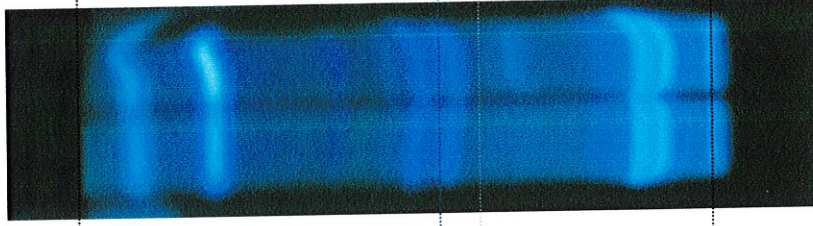

Front

Start

Eleuth B Rf: 0,44  
Eleuth E Rf: 0,36

Absorbent: Silica gel 60 F<sub>254</sub> precoated TLC plates  
Solvent system: chloroform : methanol : water (70 : 40 : 10)  
Spray reagents: vanillin-phosphoric acid

Sign: *Mattias*

Date: 2011-02-21

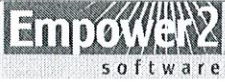

## SampleName Eleuth 1521077

Current Date 2011-02-18  
 Software Empower 2 Software Build 2154  
 Column no.: 812269  
 Run Time 45.00 Minutes  
 Channel 254 nm, 262 nm

Processing Method Konsmedel\_extr

### Potassiumsorbate Methyl-4-hydroxybenzoate

Start Date 2011-02-17 13:17:40 CET

#### Component Results Name: Potassiumsorbate

|           | SampleName     | RT     | Injection Volume (uL) | SampleWeight | Area    | Height | Name             | Percent_amount |
|-----------|----------------|--------|-----------------------|--------------|---------|--------|------------------|----------------|
| 1         | Eleuth 1521077 | 28.640 | 10.00                 | 380.50000    | 3492182 | 60841  | Potassiumsorbate | 0.097          |
| 2         | Eleuth 1521077 | 28.673 | 10.00                 | 380.50000    | 3511265 | 61224  | Potassiumsorbate | 0.097          |
| 3         | Eleuth 1521077 | 28.713 | 10.00                 | 380.50000    | 3511119 | 60950  | Potassiumsorbate | 0.097          |
| Mean      |                |        |                       |              | 3504855 |        |                  | 0.097          |
| Std. Dev. |                |        |                       |              | 10975   |        |                  | 0.000          |
| % RSD     |                |        |                       |              | 0.3     |        |                  | 0.29           |

#### Component Results Name: Methyl-4-hydroxybenzoate

|           | SampleName     | RT     | Injection Volume (uL) | SampleWeight | Area    | Height | Name                     | Percent_amount |
|-----------|----------------|--------|-----------------------|--------------|---------|--------|--------------------------|----------------|
| 1         | Eleuth 1521077 | 36.214 | 10.00                 | 380.50000    | 1935028 | 27296  | Methyl-4-hydroxybenzoate | 0.095          |
| 2         | Eleuth 1521077 | 36.269 | 10.00                 | 380.50000    | 1849160 | 26945  | Methyl-4-hydroxybenzoate | 0.091          |
| 3         | Eleuth 1521077 | 36.338 | 10.00                 | 380.50000    | 1907624 | 27212  | Methyl-4-hydroxybenzoate | 0.094          |
| Mean      |                |        |                       |              | 1897271 |        |                          | 0.093          |
| Std. Dev. |                |        |                       |              | 43860   |        |                          | 0.002          |
| % RSD     |                |        |                       |              | 2.3     |        |                          | 2.18           |

| <u>Results</u>                   | <u>%</u> | <u>Theoretical</u> | <u>Yield</u> |
|----------------------------------|----------|--------------------|--------------|
| <u>Potassiumsorbate:</u>         | 0,097%   | 0,165%             | 59%          |
| <u>Methyl-4-hydroxybenzoate:</u> | 0,093%   | 0,169%             | 55%          |

Sign.: Ms



### Chromatogram

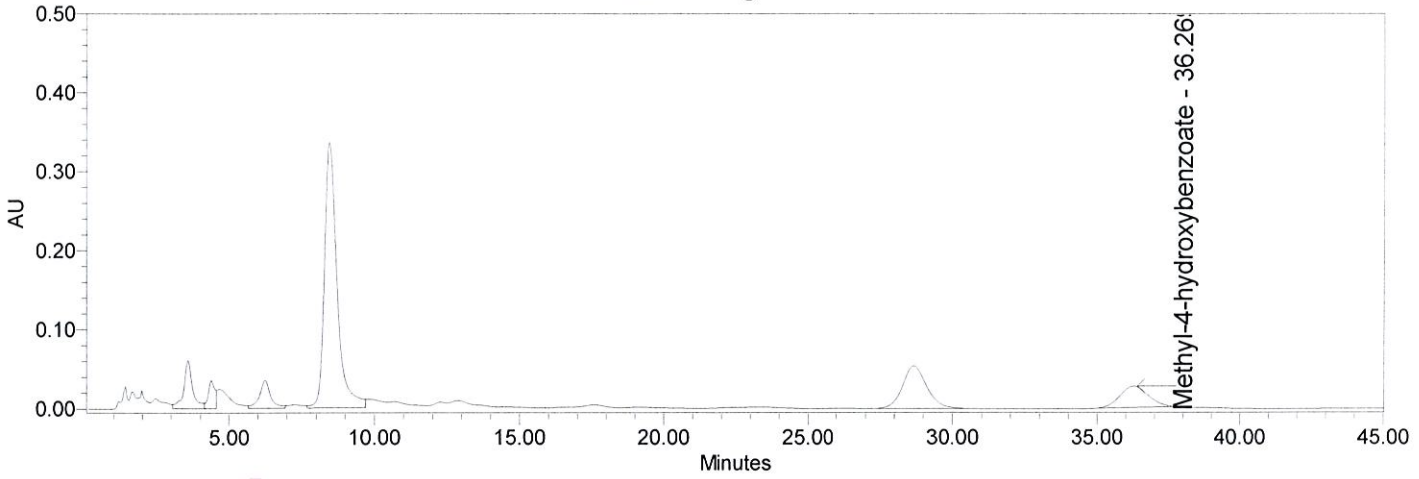

SampleName Eleuth 1521077; Vial 4; Date Acquired 2011-02-17 20:55:16 CET; Channel Name 254 nm

### Chromatogram

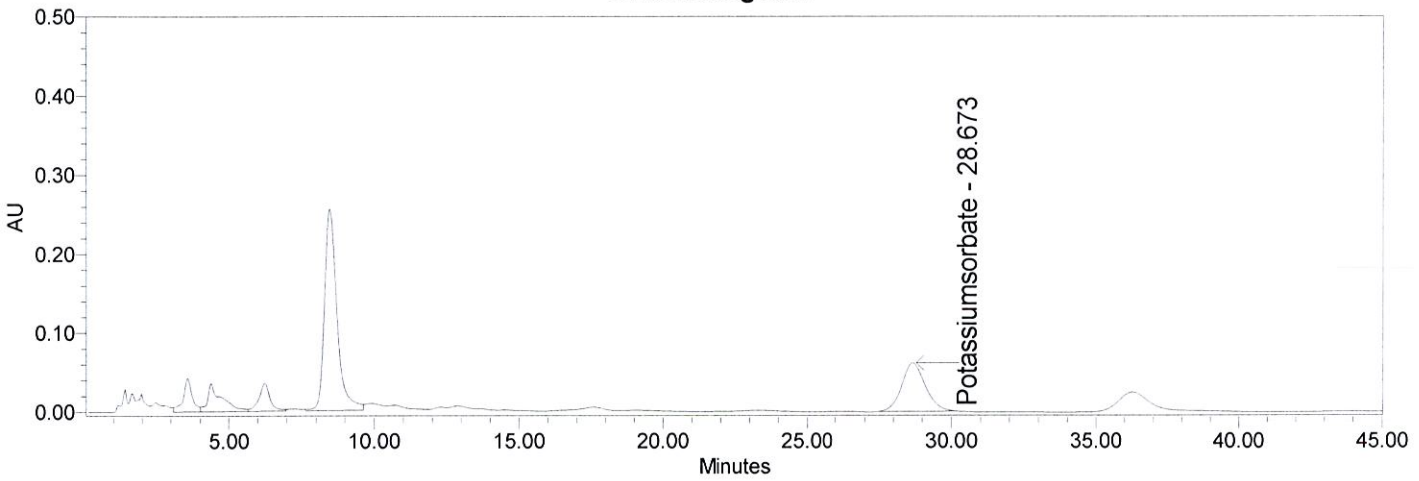

SampleName Eleuth 1521077; Vial 4; Date Acquired 2011-02-17 20:55:16 CET; Channel Name 262 nm

### Chromatogram

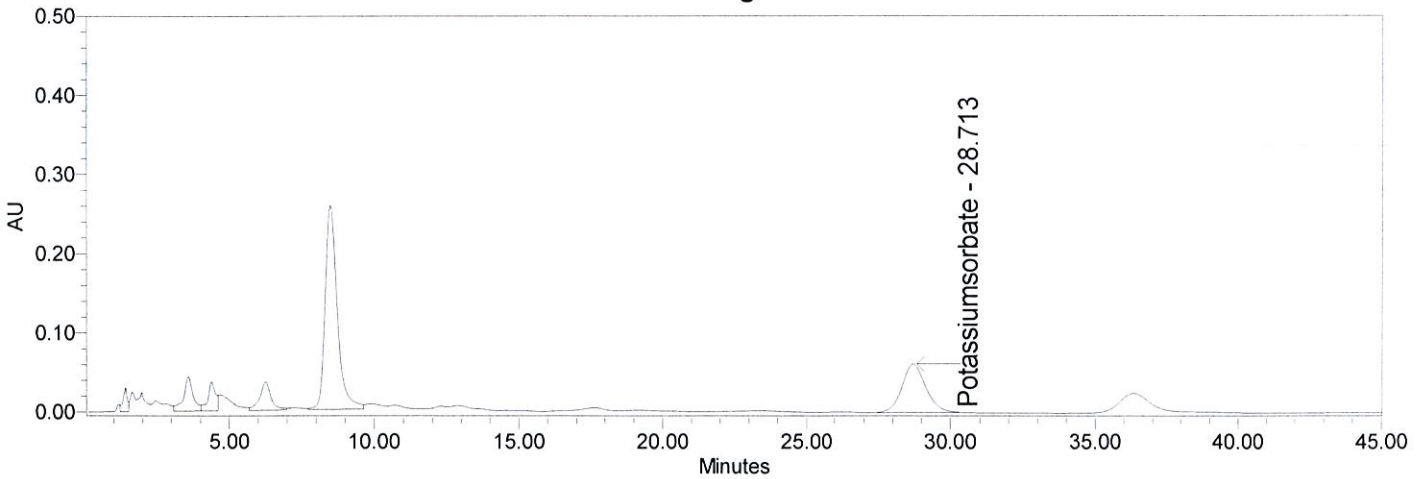

SampleName Eleuth 1521077; Vial 4; Date Acquired 2011-02-17 21:41:19 CET; Channel Name 262 nm

Sign.: Ma

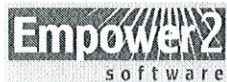

**SampleName Eleuth 1521077**

Rapport\_extrakt

Software Empower 2 Software Build 215  
 Column no.: 937031  
 Run Time 35.00 Minutes  
 Channel PDA\_210.0nm, PDA\_220.0nm  
 System Name HPLC

Current Date 2011-02-17  
 Processing Method Acax\_validerad  
 Start Date 2011-02-16 13:34:43

**Eleutherosid B**  
**Eleutherosid E**

**Name: Eleutherosid B**

|           | SampleName     | Injection Volume (ul) | SampleWeight | Dilution | RT    | Area    | Height | Name           | Procent_Amount |
|-----------|----------------|-----------------------|--------------|----------|-------|---------|--------|----------------|----------------|
| 1         | Eleuth 1521077 | 20.00                 | 83.20000     | 1.00000  | 5.746 | 1485129 | 84983  | Eleutherosid B | 0.384          |
| 2         | Eleuth 1521077 | 20.00                 | 83.20000     | 1.00000  | 5.797 | 1522082 | 84010  | Eleutherosid B | 0.394          |
| 3         | Eleuth 1521077 | 20.00                 | 83.20000     | 1.00000  | 5.808 | 1487197 | 84077  | Eleutherosid B | 0.384          |
| Mean      |                |                       |              |          |       |         |        |                | 0.387          |
| Std. Dev. |                |                       |              |          |       |         |        |                | 0.006          |
| % RSD     |                |                       |              |          |       |         |        |                | 1.44           |

**Name: Eleutherosid E**

|           | SampleName     | Injection Volume (ul) | SampleWeight | Dilution | RT     | Area    | Height | Name           | Procent_Amount |
|-----------|----------------|-----------------------|--------------|----------|--------|---------|--------|----------------|----------------|
| 1         | Eleuth 1521077 | 20.00                 | 83.20000     | 1.00000  | 18.193 | 2174703 | 127252 | Eleutherosid E | 0.507          |
| 2         | Eleuth 1521077 | 20.00                 | 83.20000     | 1.00000  | 18.215 | 2165848 | 129793 | Eleutherosid E | 0.504          |
| 3         | Eleuth 1521077 | 20.00                 | 83.20000     | 1.00000  | 18.236 | 2160819 | 131999 | Eleutherosid E | 0.503          |
| Mean      |                |                       |              |          |        |         |        |                | 0.505          |
| Std. Dev. |                |                       |              |          |        |         |        |                | 0.002          |
| % RSD     |                |                       |              |          |        |         |        |                | 0.36           |

| <b>Results</b>         | <b>%</b> | <b>Theoretical</b> | <b>Yield</b> |
|------------------------|----------|--------------------|--------------|
| <b>Eleutherosid B:</b> | 0,39%    | 0,38               |              |
| <b>Eleutherosid E:</b> | 0,50%    | 0,46               |              |
| <b>Eleutherosides:</b> | 0,89%    | 0,84               | 106%         |

**Chromatogram**

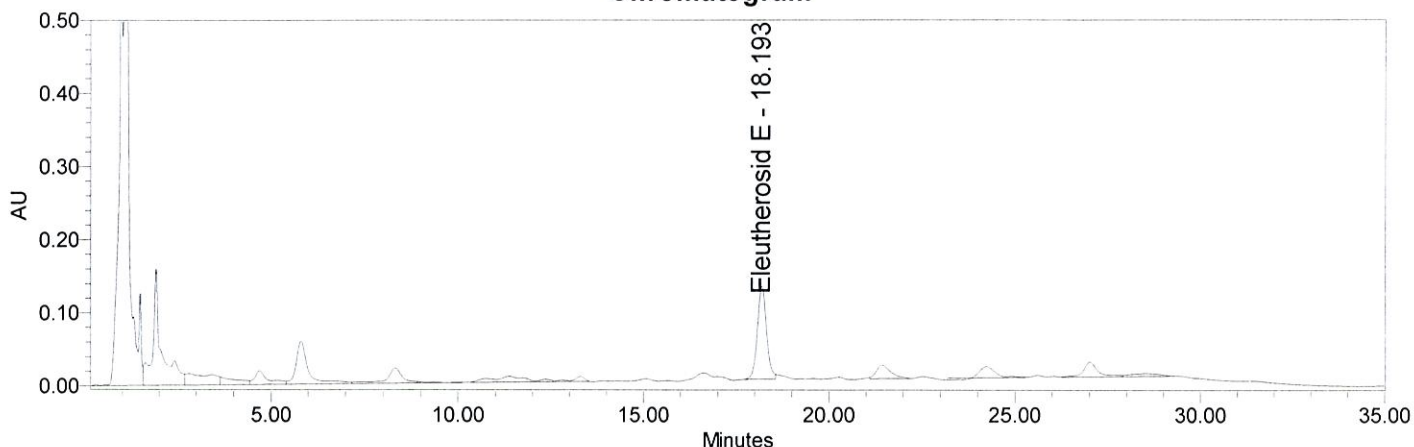

SampleName Eleuth 1521077; Vial 4; Date Acquired 2011-02-16 20:30:21 CET; Channel Name PDA\_210.0nm

Sign.:

**Chromatogram**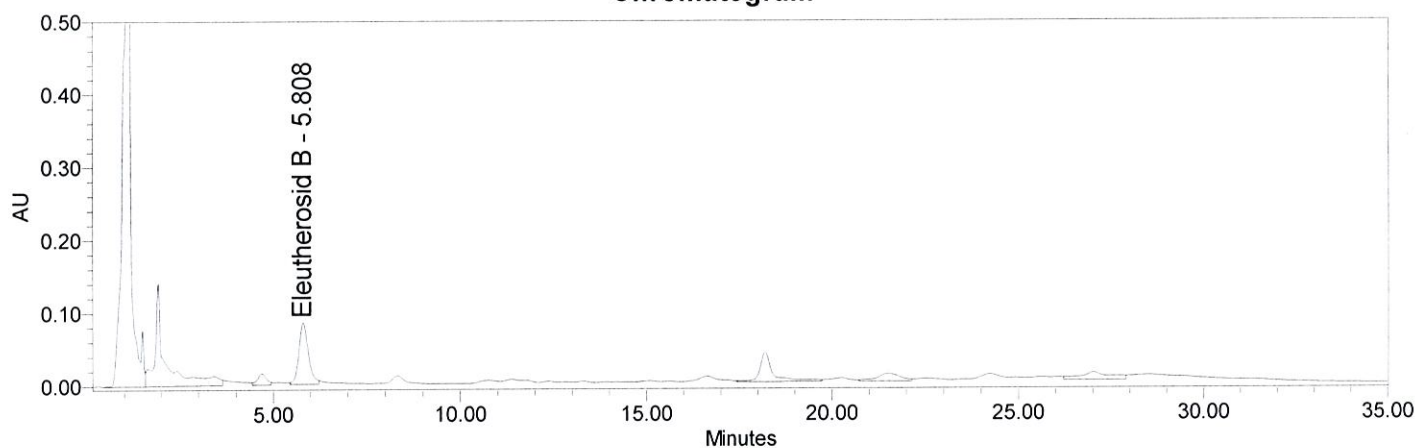

SampleName Eleuth 1521077; Vial 4; Date Acquired 2011-02-16 20:30:21 CET; Channel Name PDA\_220.0nm

**Chromatogram**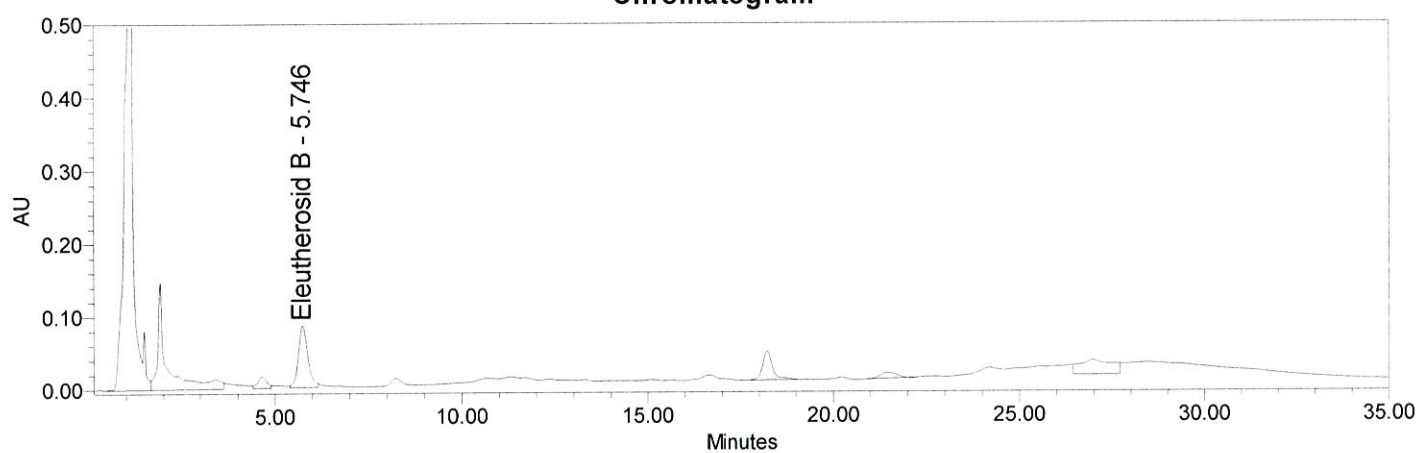

SampleName Eleuth 1521077; Vial 4; Date Acquired 2011-02-16 21:16:16 CET; Channel Name PDA\_220.0nm

**Chromatogram**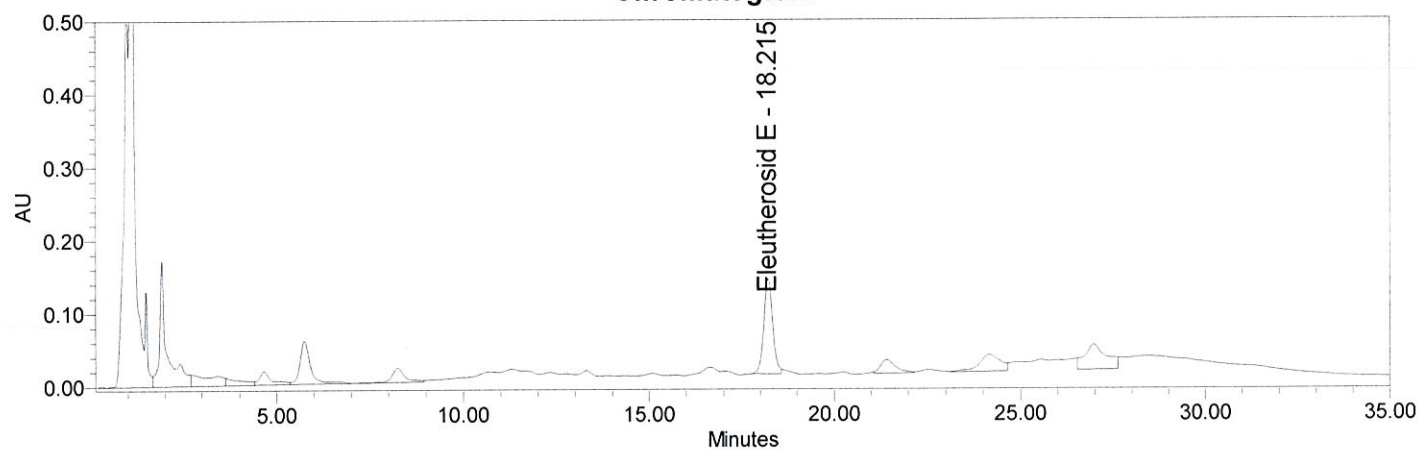

SampleName Eleuth 1521077; Vial 4; Date Acquired 2011-02-16 21:16:16 CET; Channel Name PDA\_210.0nm

Sign.: 

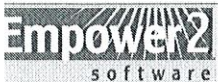

**Second identification with PDA**

Current Date 2011-02-17  
 Software Empower 2 Software Build 2  
 Column no.: 937031  
 System Name HPLC

Processing Method Acanth\_PDA  
 Run Time 35.00 Minutes  
 Start Date 2011-02-16 13:34:43 CET

**Eleutherosid B,  
 Eleutherosid E  
 SampleName Eleuth 1521077**

**Spectrum Index Plot**

Eleutherosid E - 18.193

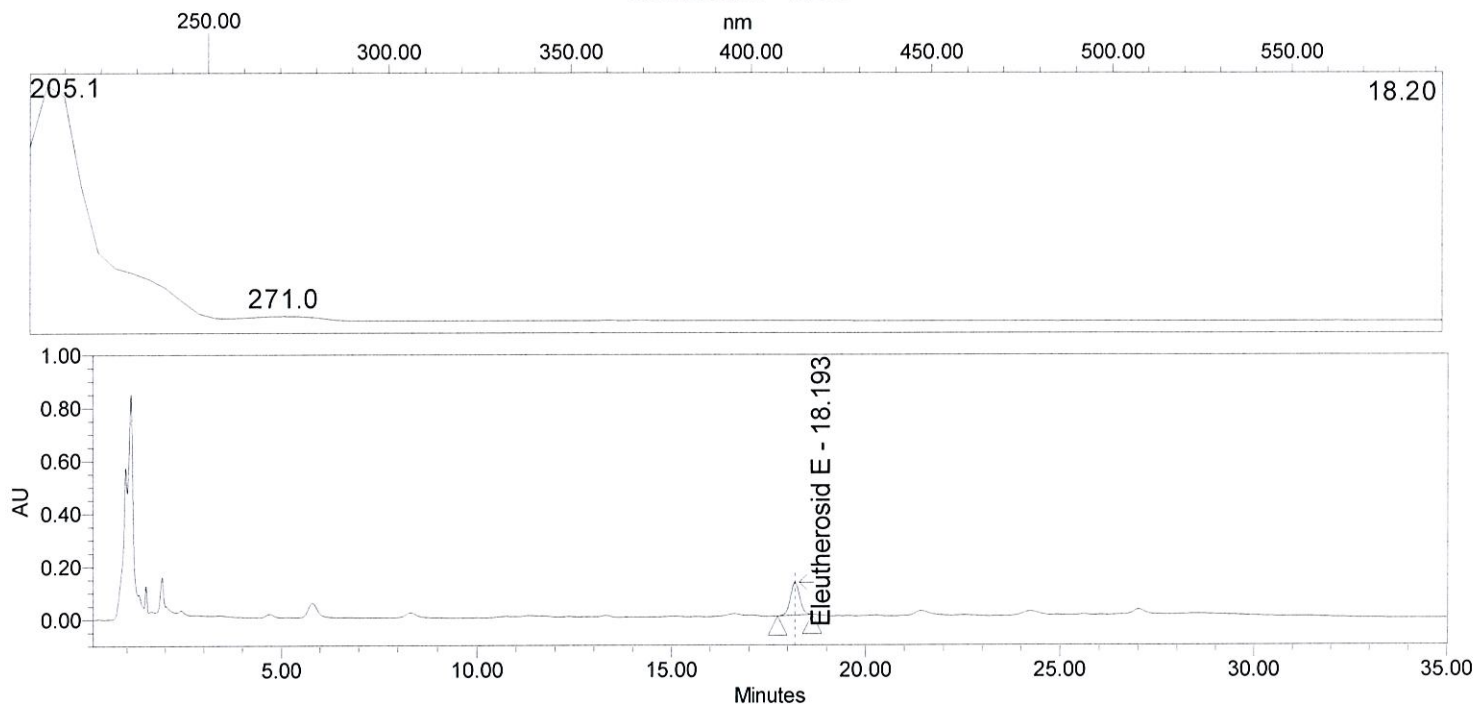

**Spectrum Index Plot**

Eleutherosid B - 5.808

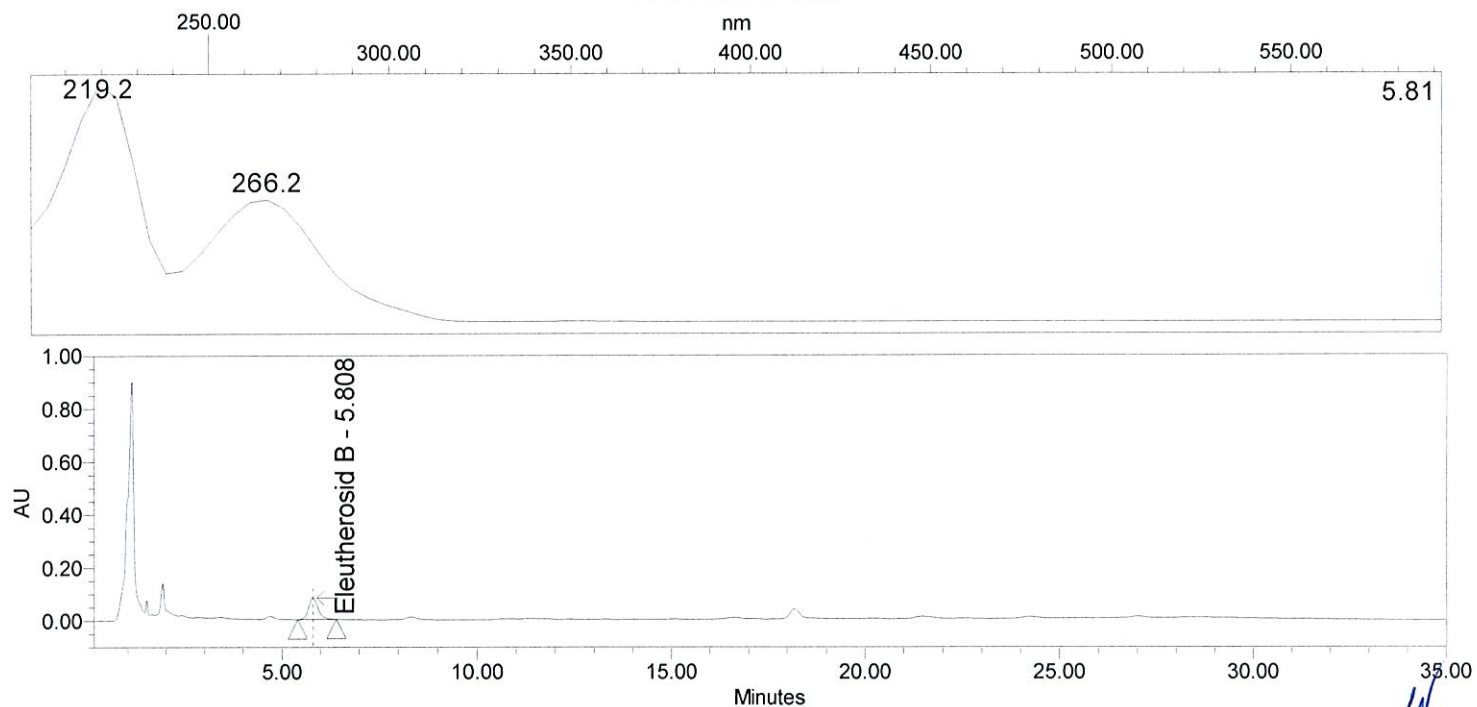

Sign.: 

**Match Plot**

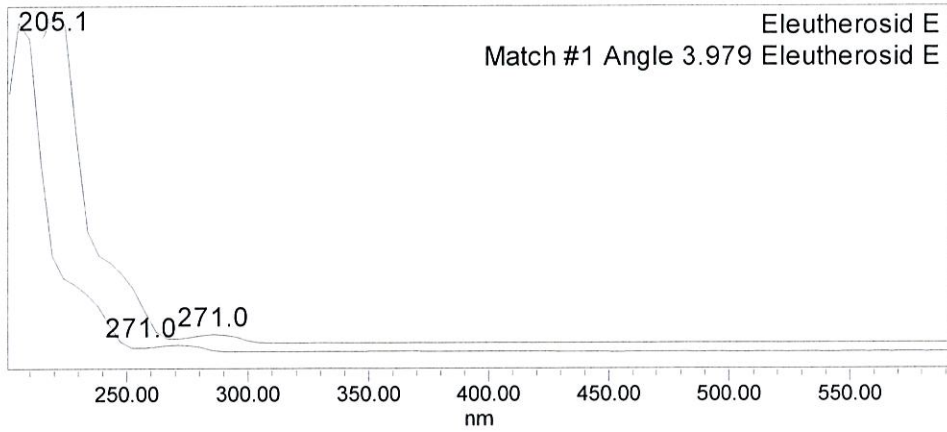

SampleName Eleuth 1521077 Vial 4 Injection 1 Date Acquired 2011-02-16  
 20:30:21 CET Name Eleutherosid E Match1 Angle 3.979 Match1 Threshold 1.204  
 Match1 Spect. Name Eleutherosid E

**Match Plot**

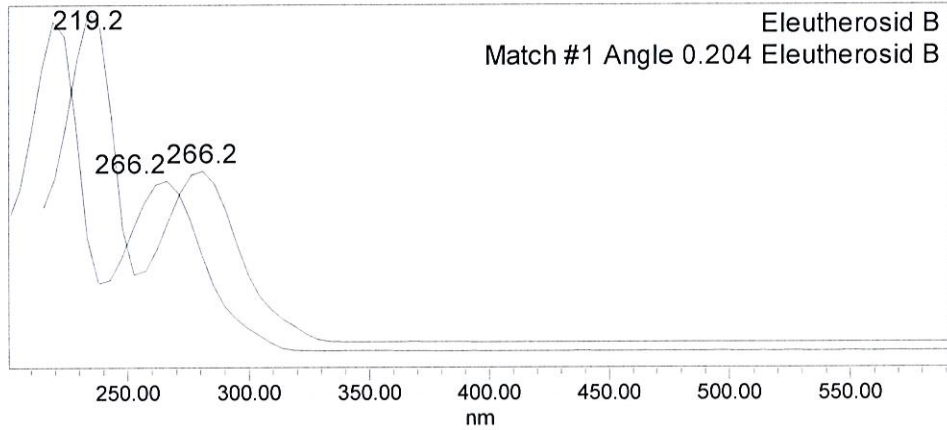

SampleName Eleuth 1521077 Vial 4 Injection 1 Date Acquired 2011-02-16  
 20:30:21 CET Name Eleutherosid B Match1 Angle 0.204 Match1 Threshold 1.120  
 Match1 Spect. Name Eleutherosid B

**PDA Result Table**

|   | Name           | RT     | Purity1 Angle | Purity1 Threshold | Match1 Spect. Name | Match1 Angle | Match1 Threshold |
|---|----------------|--------|---------------|-------------------|--------------------|--------------|------------------|
| 1 | Eleutherosid B | 5.808  | 0.301         | 1.236             | Eleutherosid B     | 0.204        | 1.120            |
| 2 | Eleutherosid E | 18.193 | 1.293         | 1.382             | Eleutherosid E     | 3.979        | 1.204            |

Sign.: 

PhytoLab GmbH & Co.KG Dutendorfer Straße 5-7 91487 Vestenbergsgreuth

Swedish Herbal Institute  
Eva Vencel  
Kövlingevägen 21  
312 50 Vallberga  
Sweden

PhytoLab GmbH & Co.KG  
Dutendorfer Straße 5-7  
91487 Vestenbergsgreuth  
Germany  
Contact at PhytoLab:  
Annette Reichel  
Tel: +49 9163 88-188  
Fax: +49 9163 88-379  
annette.reichel@phytolab.de

Date: 7.03.11

Cust.No: 91778

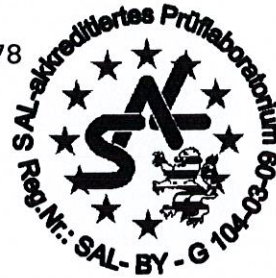

### Certificate of analysis

Report-No.: 12461844- 40 001  
Cust.-lot: 1521077  
Sample labelling: Eleutherococcus sicc. extr  
Sample description: brown powder  
Packing: PE-container with screw closure  
Receipt of sample: 24.02.11

| Test                                                                                                                                                                                                                                                                                                                                                                                         | Unit  | Limits     | Testresult |
|----------------------------------------------------------------------------------------------------------------------------------------------------------------------------------------------------------------------------------------------------------------------------------------------------------------------------------------------------------------------------------------------|-------|------------|------------|
| Microbiology: Category B, Herbal medicinal products containing, for example, extracts and/ or herbal drugs, with or without excipients, where the method of processing (for example, extraction) or, where appropriate, in the case of herbal drugs, of pre-treatment reduces the levels of organisms to below those stated for this category, according to Ph. Eur. 6.7, 5.1.8, SOP 803911: |       |            | Conform    |
| Total aerobic microbial count (TAMC), SOP 300007                                                                                                                                                                                                                                                                                                                                             | CFU/g | < = 50,000 | 180        |
| Moulds, SOP 300014                                                                                                                                                                                                                                                                                                                                                                           | CFU/g |            | < 10       |
| Yeasts, SOP 300023                                                                                                                                                                                                                                                                                                                                                                           | CFU/g |            | 30         |
| Total combined yeasts and moulds count (TYMC), SOP 300033                                                                                                                                                                                                                                                                                                                                    | CFU/g | < = 500    | 30         |
| Bile-tolerant gram-negative bacteria (semiquantitative, PN method), SOP 300044                                                                                                                                                                                                                                                                                                               | CFU/g | < = 100    | < 10       |
| Escherichia coli (absence test), SOP 300058                                                                                                                                                                                                                                                                                                                                                  | /g    | Absent     | Absent     |
| Salmonella (qualitative), SOP 300122                                                                                                                                                                                                                                                                                                                                                         | /25 g | Absent     | Absent     |

Information on the method employed and on method characteristics is available to customers on request. The results apply to the supplied sample. Copying of the document is only permissible without any modification of the document.

Vestenbergsgreuth, 7.03.11



Elke Lenzer

PhytoLab GmbH & Co.KG Dutendorfer Straße 5-7 91487 Vestenbergsgreuth

Swedish Herbal Institute  
Eva Vencel  
Kövlingevägen 21  
312 50 Vallberga  
Sweden

PhytoLab GmbH & Co.KG  
Dutendorfer Straße 5-7  
91487 Vestenbergsgreuth  
Germany  
Contact at PhytoLab:  
Annette Reichel  
Tel: +49 9163 88-188  
Fax: +49 9163 88-379  
annette.reichel@phytolab.de

Date: 7.03.11

Cust.No: 91778

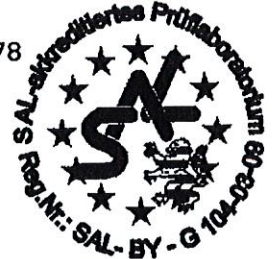

**Certificate of analysis**

Report-No.: 12461844- 40 001  
Cust.-lot: 1521077  
Sample labelling: Eleutherococcus sicc. extr  
Sample description: brown powder  
Packing: PE-container with screw closure  
Receipt of sample: 24.02.11

| Test                                                                                                                                                                                                                                                                                                                                                                                         | Unit  | Limits    | Testresult |
|----------------------------------------------------------------------------------------------------------------------------------------------------------------------------------------------------------------------------------------------------------------------------------------------------------------------------------------------------------------------------------------------|-------|-----------|------------|
| Microbiology: Category B, Herbal medicinal products containing, for example, extracts and/ or herbal drugs, with or without excipients, where the method of processing (for example, extraction) or, where appropriate, in the case of herbal drugs, of pre-treatment reduces the levels of organisms to below those stated for this category, according to Ph. Eur. 6.7, 5.1.8, SOP 803911: |       |           | Conform    |
| Total aerobic microbial count (TAMC), SOP 300007                                                                                                                                                                                                                                                                                                                                             | CFU/g | <= 50,000 | 180        |
| Moulds, SOP 300014                                                                                                                                                                                                                                                                                                                                                                           | CFU/g |           | < 10       |
| Yeasts, SOP 300023                                                                                                                                                                                                                                                                                                                                                                           | CFU/g |           | 30         |
| Total combined yeasts and moulds count (TYMC), SOP 300033                                                                                                                                                                                                                                                                                                                                    | CFU/g | <= 500    | 30         |
| Bile-tolerant gram-negative bacteria (semiquantitative, PN method), SOP 300044                                                                                                                                                                                                                                                                                                               | CFU/g | <= 100    | < 10       |
| Escherichia coli (absence test), SOP 300058                                                                                                                                                                                                                                                                                                                                                  | /g    | Absent    | Absent     |
| Salmonella (qualitative), SOP 300122                                                                                                                                                                                                                                                                                                                                                         | /25 g | Absent    | Absent     |

Information on the method employed and on method characteristics is available to customers on request. The results apply to the supplied sample. Copying of the document is only permissible without any modification of the document.

Vestenbergsgreuth, 7.03.11

  
Elke Lenzer

2011.03.07  
W

Svenska Örtmedicinska Institutet  
Eva Vencel  
Kövlingevägen 21  
SE-312 50 Vallberga

Eurofins Pharma A/S  
Strandesplanaden 110  
DK-2665 Vallensbæk Strand  
Denmark

Tel. +45 70 22 42 66  
Fax +45 70 22 42 55  
[eurofins@eurofins.dk](mailto:eurofins@eurofins.dk)  
[www.eurofins.dk](http://www.eurofins.dk)

Date  
01 March 2011  
Our ref.  
940848/SLH

## Analytical report

|                        |                                |
|------------------------|--------------------------------|
| <b>Sample received</b> | <b>Test sample</b>             |
| 23 February 2011       | Eleutherococcus extract siccum |

Customer's journal no/ project title:

-

Label(s): Batch no. 1521077

Information from client: -

---

Methods: Specific references are listed with the test results.

Reference: -

Results: Results are reported on page 2-3.

Comments: Samples are analysed by the laboratory:  
Dr. Fintelmann und Dr. Meyer, GMBH, Germany

---

Signatures

  
Sandy Leth  
MSc (Pharm)



Eurofins Fintelmann und Meyer GMP GmbH · Großmoorbogen 25 · D-21079 Hamburg

Svenska Ortmedicinska Instituttet  
attn. Mrs. Eva Vencel  
Kövlingevägen 21  
31250  
SCHWEDEN

Tel: +49 40 49 294 670

Fax: +49 40 49 294 699

info@fintelmann-meyer.de

www.fintelmann-meyer.de

Report date 28.02.2011

Page 1/2

Analytical report AR-11-FG-001467-01

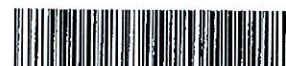

Sample Code 714-2011-00002782

|                              |                                                                      |
|------------------------------|----------------------------------------------------------------------|
| <b>Reference</b>             | Eleutherococcus<br>extrakt siccum<br>Batch nr:15 21077<br>16.02.2011 |
| <b>Sample sender</b>         | Mrs. Eva Vencel                                                      |
| <b>Prescriber</b>            | Eurofins Pharma A/S                                                  |
| <b>Reception date time</b>   | 24.02.2011                                                           |
| <b>Client sample code</b>    | Our reference number:9408-4801                                       |
| <b>Packaging</b>             | plastic container                                                    |
| <b>Reception temperature</b> | room temperature                                                     |
| <b>Storage conditions</b>    | room temperature                                                     |
| <b>Start analysis</b>        | 24.02.2011                                                           |
| <b>End analysis</b>          | 28.02.2011                                                           |

**Test results**

|              |                                       |    |   |
|--------------|---------------------------------------|----|---|
| <b>FGL15</b> | <b>Ethanol</b>                        |    |   |
| Method       | EP 7.0, on the basis of method 2.4.24 |    |   |
| Ethanol      |                                       | <1 | % |

**JUDGEMENT**

With regard to the analysed parameters the tested sample material meets the respective requirements of the customer.

"Analysis required by Eurofins Pharma A/S"

**Fintelmann und Meyer GMP GmbH**

Analytical report AR-11-FG-001467-01  
Sample Code 714-2011-00002782

Signature

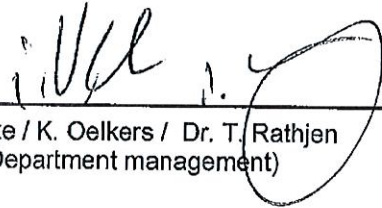

Dr. H. Neumann-Hensel / B. Kohnke / K. Oelkers / Dr. T. Rathjen  
(General manager) (Department management)

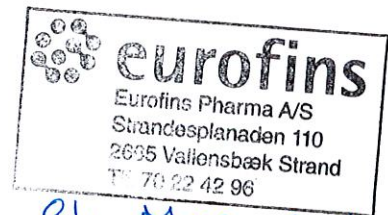

2011.04.07  
ly

01. Mar. 2011  


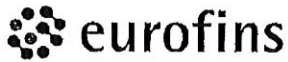

## Fintelmann und Meyer GMP GmbH

Eurofins Fintelmann und Meyer GMP GmbH  
Großmoorbogen 25  
D-21079 Hamburg  
GERMANY

Eurofins Fintelmann und Meyer GMP GmbH · Großmoorbogen 25 · D-21079 Hamburg

Svenska Orfimedicenska Institutet  
attn. Mrs. Eva Vencel  
Kövlingevägen 21  
31250  
SCHWEDEN

Tel: +49 40 49 294 670  
Fax: +49 40 49 294 699

Info@fintelmann-meyer.de  
www.fintelmann-meyer.de

Report date 28.02.2011

Page 1/2

Analytical report AR-11-FG-001467-01

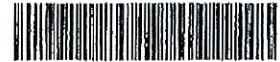

Sample Code 714-2011-00002782

|                              |                                                                       |
|------------------------------|-----------------------------------------------------------------------|
| <b>Reference</b>             | Eleutherococcus<br>extrakt siccum<br>Batch nr: 15 21077<br>16.02.2011 |
| <b>Sample sender</b>         | Mrs. Eva Vencel                                                       |
| <b>Prescriber</b>            | Eurofins Pharma A/S                                                   |
| <b>Reception date time</b>   | 24.02.2011                                                            |
| <b>Client sample code</b>    | Our reference number: 9408-4801                                       |
| <b>Packaging</b>             | plastic container                                                     |
| <b>Reception temperature</b> | room temperature                                                      |
| <b>Storage conditions</b>    | room temperature                                                      |
| <b>Start analysis</b>        | 24.02.2011                                                            |
| <b>End analysis</b>          | 28.02.2011                                                            |

### Test results

|              |                                       |    |   |
|--------------|---------------------------------------|----|---|
| <b>FGL15</b> | <b>Ethanol</b>                        |    |   |
| Method       | EP 7.0, on the basis of method 2.4.24 |    |   |
| Ethanol      |                                       | <1 | % |

### JUDGEMENT

With regard to the analysed parameters the tested sample material meets the respective requirements of the customer.

"Analysis required by Eurofins Pharma A/S"

2011.03.01

M

**Fintelmann und Meyer GMP GmbH**Analytical report AR-11-FG-001467-01  
Sample Code 714-2011-00002782

Signature

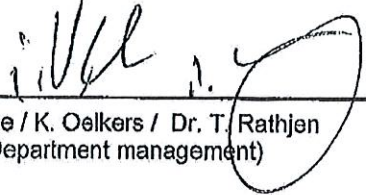

---

Dr. H. Neumann-Hensel / B. Kohnke / K. Oelkers / Dr. T. Rathjen  
(General manager) (Department management)

 eurofins  
Eurofins Pharma A/S  
Strandesplanaden 110  
2635 Vallonsbæk Strand  
Tlf. 70 22 42 96

01. Mar. 2011

Svenska Örtmedicinska Institutet  
Eva Vencel  
Kövlingsvägen 21  
SE-312 50 Vallberga

Eurofins Pharma A/S  
Strandesplanaden 110  
DK-2665 Vallensbæk Strand  
Denmark

Tel. +45 70 22 42 66  
Fax +45 70 22 42 55  
[eurofins@eurofins.dk](mailto:eurofins@eurofins.dk)  
[www.eurofins.dk](http://www.eurofins.dk)

Date  
01 March 2011  
Our ref.  
940848/SLH

## Analytical report

|                  |                                |
|------------------|--------------------------------|
| Sample received  | Test sample                    |
| 23 February 2011 | Eleutherococcus extract siccum |

Customer's journal no/ project title:

-

Label(s): Batch no. 1521077

Information from client: -

---

Methods: Specific references are listed with the test results.

Reference: -

Results: Results are reported on page 2-3.

Comments: Samples are analysed by the laboratory:  
Dr. Fintelmann und Dr. Meyer, GMBH, Germany

---

Signatures

  
Sandy Leth  
MSc (Pharm)
