# Supplementary material for: Early intervention with Kan Jang® to treat upper-respiratory tract infections: A randomized, quadruple-blind study
Source: PubMed Central journal article supplement (PMC8572720; doi:10.1016/j.jtcme.2021.06.001), 2021-06-11
Supplement: mmc4.pdf [file mmc4.pdf]

## **SAFETY EVALUATION**

### **Extent of Exposure**

Duration: 1-5 days

Dose: 6 capsules daily, in total of 935 mg of fixed combination of 866.4 mg proprietary *Andrographis paniculata* L. Nees. herb standardized native extract , and 68.4mg proprietary *Eleutherococcus senticosus* root native extract, equivalent to 5.8 mg of Herba Andrographidis, and 1.2 g of Radix Eleutherococci.<sup>2</sup>

### **Adverse Events (AEs)**

#### **Summary of adverse events**

The treatment was well tolerated. The only common side effect was a mild pruritus (itchy skin), observed in 10 patients: 6 in the placebo group, and 4 - in the Kan Jang group. Serious adverse events were not observed.

#### **Display of adverse events**

Adverse events occurring after initiation of study treatments, including events likely to be related to the underlying disease or likely to represent concomitant illness are displayed in summary tables 1 and 2.

No adverse events of allergic reactions like urticaria, angioedema, paresthesia, anaphylactic reactions, rash were observed.

#### **Analysis of adverse events**

Analysis of adverse events observed in placebo and verum groups (Tables 1 and 22) shows that:

- the types adverse events are the same o in both groups
- the frequency (in % ) is the same o in both groups.

It can be concluded that these events are not related to the treatment..

#### **Deaths, Other Serious Adverse Events, and Other Significant Adverse Events**

Deaths, other serious adverse events, and other significant adverse events deserve special attention have not been observed in this study.

#### **Clinical Laboratory Evaluation**

The results of blood analysis, table 19, shows normalizing (anti-inflammatory) effect of Kan Jang.

#### **Vital Signs, Physical Findings, and Other Observations Related to Safety**

Vital signs related to safety do not reveal any evidence of a drug effect.

#### **Safety Conclusions**

The treatment was well tolerated. The only common side effect was a mild pruritus, observed in 10 patients: 6 in the placebo group, and 4 - in the Kan Jang group. Serious adverse events were not observed.

**Table 1.** Adverse events: treatment emergent signs and symptoms" (TESS) - those not seen at baseline. Number observed and rate with patient identification. Kan Jang group, N=94

| Adverse event        | Mild             |                                        | Moderate         |    | Severe           |    | Total            |    | Total<br>R+NR * |
|----------------------|------------------|----------------------------------------|------------------|----|------------------|----|------------------|----|-----------------|
|                      | Possibly Related | NR*                                    | Possibly Related | NR | Possibly Related | NR | Possibly Related | NR |                 |
| Pruritus/ itchy skin |                  | 4(4.2%)<br>N47**<br>N51<br>N46<br>N160 |                  |    |                  |    |                  |    | 4 (4.2%)        |

\* NR = not related; R – possibly related \*\* Patient identification number

**Table 2.** Adverse events: treatment emergent signs and symptoms" (TESS) - those not seen at baseline. Number observed and rate with patient identification. Placebo group, N=85

| Adverse event        | Mild             |                                                      | Moderate         |    | Severe           |    | Total            |    | Total<br>R+NR |
|----------------------|------------------|------------------------------------------------------|------------------|----|------------------|----|------------------|----|---------------|
|                      | Possibly Related | NR*                                                  | Possibly Related | NR | Possibly Related | NR | Possibly Related | NR |               |
| Pruritus/ itchy skin |                  | 6 (7.0%)<br>N7**<br>N77<br>N66<br>N196<br>N36<br>N10 |                  |    |                  |    |                  |    | 6 (7.0%)      |

**Table 3.** Overall summary of the treatment-emergent adverse events

|                                              | Group B<br>(Kan Jang) | Group A<br>(Placebo) | Total     | Odds ratio,<br>B/A | z statistic  | Significance<br>level,<br>p value |
|----------------------------------------------|-----------------------|----------------------|-----------|--------------------|--------------|-----------------------------------|
| Number of patients                           | 94                    | 85                   | 179       |                    |              |                                   |
| Patients with AE                             | 4 (4.2%)              | 6 (7.1%)             | 10 (5.6%) | <b>0.5852</b>      | <b>0.807</b> | <b>0.4194</b>                     |
| Total number of AEs:<br>pruritus/ itchy skin | 4 (4.2%)              | 6 (7.1%)             | 10 (5.6%) |                    |              |                                   |
| Number of patients with<br>other serious AEs | 0 (0%)                | 0 (0%)               | 0 (0%)    |                    |              |                                   |
| Number of patients<br>withdrawn for AEs      | 0 (0%)                | 0 (0%)               | 0 (0%)    |                    |              |                                   |
| Cases of death due to AEs                    | 0 (0%)                | 0 (0%)               | 0 (0%)    |                    |              |                                   |
