# Supplementary material for: Early intervention with Kan Jang® to treat upper-respiratory tract infections: A randomized, quadruple-blind study
Source: PubMed Central journal article supplement (PMC8572720; doi:10.1016/j.jtcme.2021.06.001), 2021-06-11
Supplement: mmc5.pdf [file mmc5.pdf]

## SUPPLEMENT 4

**Table 1.** Baseline blood hematology analysis results at the beginning of URI , patients included in the study

|                         | Placebo, n=85 |         | Kan Jang, n=94 |        | p-value |
|-------------------------|---------------|---------|----------------|--------|---------|
|                         | Mean          | SE      | Mean           | SE     |         |
| Hb g/l                  | <b>140.5</b>  | 13.950  | <b>125.0</b>   | 1.409  | 0.5148  |
| RBC 10 <sup>12</sup> /l | <b>9.532</b>  | 1.360   | <b>11.42</b>   | 1.477  | 0.5905  |
| FI                      | <b>0.933</b>  | 0.0053  | <b>0.931</b>   | 0.0048 | 0.8812  |
| WBC 10 <sup>9</sup> /l  | <b>9.649</b>  | 0.1023  | <b>9.441</b>   | 0.1211 | 0.4629  |
| Stab neutrophils %      | <b>4.071</b>  | 0.1541  | <b>4.277</b>   | 0.143  | 0.3284  |
| Segmented neutrophils % | <b>60.72</b>  | 0.9282  | <b>62.09</b>   | 0.8236 | 0.3284  |
| Eosinophils %           | <b>3.729</b>  | 0.09815 | <b>3.851</b>   | 0.0855 | 0.3704  |
| Lymphocytes %           | <b>18.95</b>  | 0.2845  | <b>19.14</b>   | 0.3102 | 0.6823  |
| Monocytes %             | <b>3.259</b>  | 0.0583  | <b>3.333</b>   | 0.0558 | 0.5647  |
| ESR mm/h                | <b>22.73</b>  | 0.4366  | <b>23.36</b>   | 0.3488 | 0.4638  |

WBC – white blood cells, STN and SGN - stab and segmented neutrophils, EOS – eosinophils, L- lymphocytes, M- monocytes, ESR – erythrocytes sedimentation rate, FI- farb index.

**Table 2.** Changes from the baseline of blood hematology analysis results at the endpoint day 5

|                         | Placebo, n=85 |        | Kan Jang, n=94 |       | p-value        |
|-------------------------|---------------|--------|----------------|-------|----------------|
|                         | Mean          | SE     | Mean           | SE    |                |
| FI                      | -1.753e-01    | 0.003  | -0.002         | 0.005 | 0.992          |
| WBC 10 <sup>9</sup> /l  | -0.549        | 0.108  | -0.706         | 0.120 | <b>0.007**</b> |
| Stab neutrophils %      | -0.659        | 0.113  | -0.723         | 0.112 | 0.604          |
| Segmented neutrophils % | -0.235        | -0.235 | 0.681          | 0.591 | 0.637          |
| Eosinophils %           | -0.435        | 0.068  | -0.425         | 0.063 | 0.782          |
| Lymphocytes %           | -0.047        | 0.202  | 0.702          | 0.261 | 0.149          |
| Monocytes %             | -0.212        | 0.053  | -0.298         | 0.052 | 0.407          |
| ESR mm/h                | -2.118        | 0.223  | -2.819         | 0.208 | <b>0.026*</b>  |

WBC – white blood cells, STN and SGN - stab and segmented neutrophils, EOS – eosinophils, L- lymphocytes, M- monocytes, ESR – erythrocytes sedimentation rate, FI- farb index
