# Supplementary material for: Early intervention with Kan Jang® to treat upper-respiratory tract infections: A randomized, quadruple-blind study
Source: PubMed Central journal article supplement (PMC8572720; doi:10.1016/j.jtcme.2021.06.001), 2021-06-11
Supplement: mmc7.pdf [file mmc7.pdf]

## Supplement 4

### CONSORT Checklist

| Section/Topic                                        | Item No | Checklist item                                                                                                                                                                              | Reported on page No |
|------------------------------------------------------|---------|---------------------------------------------------------------------------------------------------------------------------------------------------------------------------------------------|---------------------|
| <b>Title and abstract</b>                            |         |                                                                                                                                                                                             |                     |
|                                                      | 1a      | Identification as a randomised trial in the title                                                                                                                                           | 1                   |
|                                                      | 1b      | Structured summary of trial design, methods, results, and conclusions (for specific guidance see CONSORT for abstracts)                                                                     | 1                   |
| <b>Introduction</b>                                  |         |                                                                                                                                                                                             |                     |
| Background and objectives                            | 2a      | Scientific background and explanation of rationale                                                                                                                                          | 2                   |
|                                                      | 2b      | Specific objectives or hypotheses                                                                                                                                                           | 2,10                |
| <b>Methods</b>                                       |         |                                                                                                                                                                                             |                     |
| Trial design                                         | 3a      | Description of trial design (such as parallel, factorial) including allocation ratio                                                                                                        | 10, Appendix A      |
|                                                      | 3b      | Important changes to methods after trial commencement (such as eligibility criteria), with reasons                                                                                          | n/a                 |
| Participants                                         | 4a      | Eligibility criteria for participants                                                                                                                                                       | 10                  |
|                                                      | 4b      | Settings and locations where the data were collected                                                                                                                                        | 10                  |
| Interventions                                        | 5       | The interventions for each group with sufficient details to allow replication, including how and when they were actually administered                                                       | 10,11 Table 1       |
| Outcomes                                             | 6a      | Completely defined pre-specified primary and secondary outcome measures, including how and when they were assessed                                                                          | 12,13,14            |
|                                                      | 6b      | Any changes to trial outcomes after the trial commenced, with reasons                                                                                                                       | n/a                 |
| Sample size                                          | 7a      | How sample size was determined                                                                                                                                                              | n/a                 |
|                                                      | 7b      | When applicable, explanation of any interim analyses and stopping guidelines                                                                                                                | n/a                 |
| <b>Randomisation:</b>                                |         |                                                                                                                                                                                             |                     |
| Sequence generation                                  | 8a      | Method used to generate the random allocation sequence                                                                                                                                      | 10                  |
|                                                      | 8b      | Type of randomisation; details of any restriction (such as blocking and block size)                                                                                                         | 10                  |
| Allocation concealment mechanism                     | 9       | Mechanism used to implement the random allocation sequence (such as sequentially numbered containers), describing any steps taken to conceal the sequence until interventions were assigned | 12                  |
| Implementation                                       | 10      | Who generated the random allocation sequence, who enrolled participants, and who assigned participants to interventions                                                                     | 12                  |
| Blinding                                             | 11a     | If done, who was blinded after assignment to interventions (for example, participants, care providers, those assessing outcomes) and how                                                    | 12                  |
|                                                      | 11b     | If relevant, description of the similarity of interventions                                                                                                                                 | 12                  |
| Statistical methods                                  | 12a     | Statistical methods used to compare groups for primary and secondary outcomes                                                                                                               | 14                  |
|                                                      | 12b     | Methods for additional analyses, such as subgroup analyses and adjusted analyses                                                                                                            | 14                  |
| <b>Results</b>                                       |         |                                                                                                                                                                                             |                     |
| Participant flow (a diagram is strongly recommended) | 13a     | For each group, the numbers of participants who were randomly assigned, received intended treatment, and were analysed for the primary outcome                                              | Appendix A          |
|                                                      | 13b     | For each group, losses and exclusions after randomisation, together with reasons                                                                                                            | 10                  |
| Recruitment                                          | 14a     | Dates defining the periods of recruitment and follow-up                                                                                                                                     | 11                  |
|                                                      | 14b     | Why the trial ended or was stopped                                                                                                                                                          | n/a                 |
| Baseline data                                        | 15      | A table showing baseline demographic and clinical characteristics for each group                                                                                                            | 4                   |
| Numbers analysed                                     | 16      | For each group, number of participants (denominator) included in each analysis and whether the analysis was by original assigned groups                                                     | 4,5                 |

| <b>Section/Topic</b>     | <b>Item No</b> | <b>Checklist item</b>                                                                                                                             | <b>Reported on page No</b> |
|--------------------------|----------------|---------------------------------------------------------------------------------------------------------------------------------------------------|----------------------------|
| Outcomes and estimation  | 17a            | For each primary and secondary outcome, results for each group, and the estimated effect size and its precision (such as 95% confidence interval) | 6                          |
|                          | 17b            | For binary outcomes, presentation of both absolute and relative effect sizes is recommended                                                       | 7                          |
| Ancillary analyses       | 18             | Results of any other analyses performed, including subgroup analyses and adjusted analyses, distinguishing pre-specified from exploratory         | n/a                        |
| Harms                    | 19             | All important harms or unintended effects in each group (for specific guidance see CONSORT for harms)                                             | 7                          |
| <b>Discussion</b>        |                |                                                                                                                                                   |                            |
| Limitations              | 20             | Trial limitations, addressing sources of potential bias, imprecision, and, if relevant, multiplicity of analyses                                  | 7                          |
| Generalisability         | 21             | Generalisability (external validity, applicability) of the trial findings                                                                         | 8                          |
| Interpretation           | 22             | Interpretation consistent with results, balancing benefits and harms, and considering other relevant evidence                                     | 9                          |
| <b>Other information</b> |                |                                                                                                                                                   |                            |
| Registration             | 23             | Registration number and name of trial registry                                                                                                    | 10                         |
| Protocol                 | 24             | Where the full trial protocol can be accessed, if available                                                                                       | 10                         |
| Funding                  | 25             | Sources of funding and other support (such as supply of drugs), role of funders                                                                   | 15                         |
